# Supplementary material for: 3D Interaction Homology: Computational Titration of Aspartic Acid, Glutamic Acid and Histidine Can Create pH-Tunable Hydropathic Environment Maps
Source: PubMed Central journal article supplement (PMC8595396; doi:10.3389/fmolb.2021.773385), 2021-11-03
Supplement: DataSheet1.pdf [file DataSheet1.pdf]

# 3D Interaction Homology: Computational Titration of Aspartic Acid, Glutamic Acid and Histidine Residues Can Create pH-Tunable Hydrophobic Environment Maps

Noah B. Herrington<sup>1</sup> and Glen E. Kellogg<sup>1,2,\*</sup>

From the <sup>1</sup>*Department of Medicinal Chemistry and Institute for Structural Biology, Drug Discovery and Development, Virginia Commonwealth University, Richmond, Virginia, USA;* <sup>2</sup>*Center for the Study of Biological Complexity, Virginia Commonwealth University, Richmond, Virginia, USA*

## This Document:

**Figure S1.** Hydrophobic interaction maps displaying the Gaussian-weighted average sidechain environments of aspartic acid in the  $\chi_1 = 60^\circ$  parse of the **c5** chess square at pH = 3.345.

**Figure S2.** Hydrophobic interaction maps displaying the Gaussian-weighted average sidechain environments of aspartic acid in the  $\chi_1 = 180^\circ$  parse of the **c5** chess square at pH = 3.345.

**Figure S3.** Hydrophobic interaction maps displaying the Gaussian-weighted average sidechain environments of aspartic acid in the  $\chi_1 = 300^\circ$  parse of the **c5** chess square at pH = 3.345.

**Figure S4.** Hydrophobic interaction maps displaying the Gaussian-weighted average sidechain environments of aspartic acid in the  $\chi_1 = 60^\circ$  parse of the **d5** chess square at pH = 3.345.

**Figure S5.** Hydrophobic interaction maps displaying the Gaussian-weighted average sidechain environments of aspartic acid in the  $\chi_1 = 180^\circ$  parse of the **d5** chess square at pH = 3.345.

**Figure S6.** Hydrophobic interaction maps displaying the Gaussian-weighted average sidechain environments of aspartic acid in the  $\chi_1 = 300^\circ$  parse of the **d5** chess square at pH = 3.345.

**Figure S7.** Hydrophobic interaction maps displaying the Gaussian-weighted average sidechain environments of aspartic acid in the  $\chi_1 = 60^\circ$  parse of the **f6** chess square at pH = 3.345.

**Figure S8.** Hydrophobic interaction maps displaying the Gaussian-weighted average sidechain environments of aspartic acid in the  $\chi_1 = 180^\circ$  parse of the **f6** chess square at pH = 3.345.

**Figure S9.** Hydrophobic interaction maps displaying the Gaussian-weighted average sidechain environments of aspartic acid in the  $\chi_1 = 300^\circ$  parse of the **f6** chess square at pH = 3.345.

**Figure S10.** Hydrophobic interaction maps displaying the Gaussian-weighted average sidechain environments of histidine in the  $\chi_1 = 180^\circ$  parse of the **b1** chess square at pH = 3.345.

**Figure S11.** Hydrophobic interaction maps displaying the Gaussian-weighted average sidechain environments of histidine in the  $\chi_1 = 300^\circ$  parse of the **b1** chess square at pH = 3.345.

**Figure S12.** Hydrophobic interaction maps displaying the Gaussian-weighted average sidechain environments of histidine in the  $\chi_1 = 60^\circ$  parse of the **c5** chess square at pH = 3.345.

**Figure S13.** Hydrophobic interaction maps displaying the Gaussian-weighted average sidechain environments of histidine in the  $\chi_1 = 180^\circ$  parse of the **c5** chess square at pH = 3.345.

**Figure S14.** Hydrophathic interaction maps displaying the Gaussian-weighted average sidechain environments of histidine in the  $\chi_1 = 300^\circ$  parse of the **c5** chess square at pH = 3.345.

**Figure S15.** Hydrophathic interaction maps displaying the Gaussian-weighted average sidechain environments of histidine in the  $\chi_1 = 60^\circ$  parse of the **d5** chess square at pH = 3.345.

**Figure S16.** Hydrophathic interaction maps displaying the Gaussian-weighted average sidechain environments of histidine in the  $\chi_1 = 180^\circ$  parse of the **d5** chess square at pH = 3.345.

**Figure S17.** Hydrophathic interaction maps displaying the Gaussian-weighted average sidechain environments of histidine in the  $\chi_1 = 300^\circ$  parse of the **d5** chess square at pH = 3.345.

**Figure S18.** Hydrophathic interaction maps displaying the Gaussian-weighted average sidechain environments of histidine in the  $\chi_1 = 60^\circ$  parse of the **f6** chess square at pH = 3.345.

**Figure S19.** Hydrophathic interaction maps displaying the Gaussian-weighted average sidechain environments of histidine in the  $\chi_1 = 180^\circ$  parse of the **f6** chess square at pH = 3.345.

**Figure S20.** Hydrophathic interaction maps displaying the Gaussian-weighted average sidechain environments of histidine in the  $\chi_1 = 300^\circ$  parse of the **f6** chess square at pH = 3.345.

**Figure S21:** Character interaction chart for the GLU **b1.300.180** parse at pH 4.224.

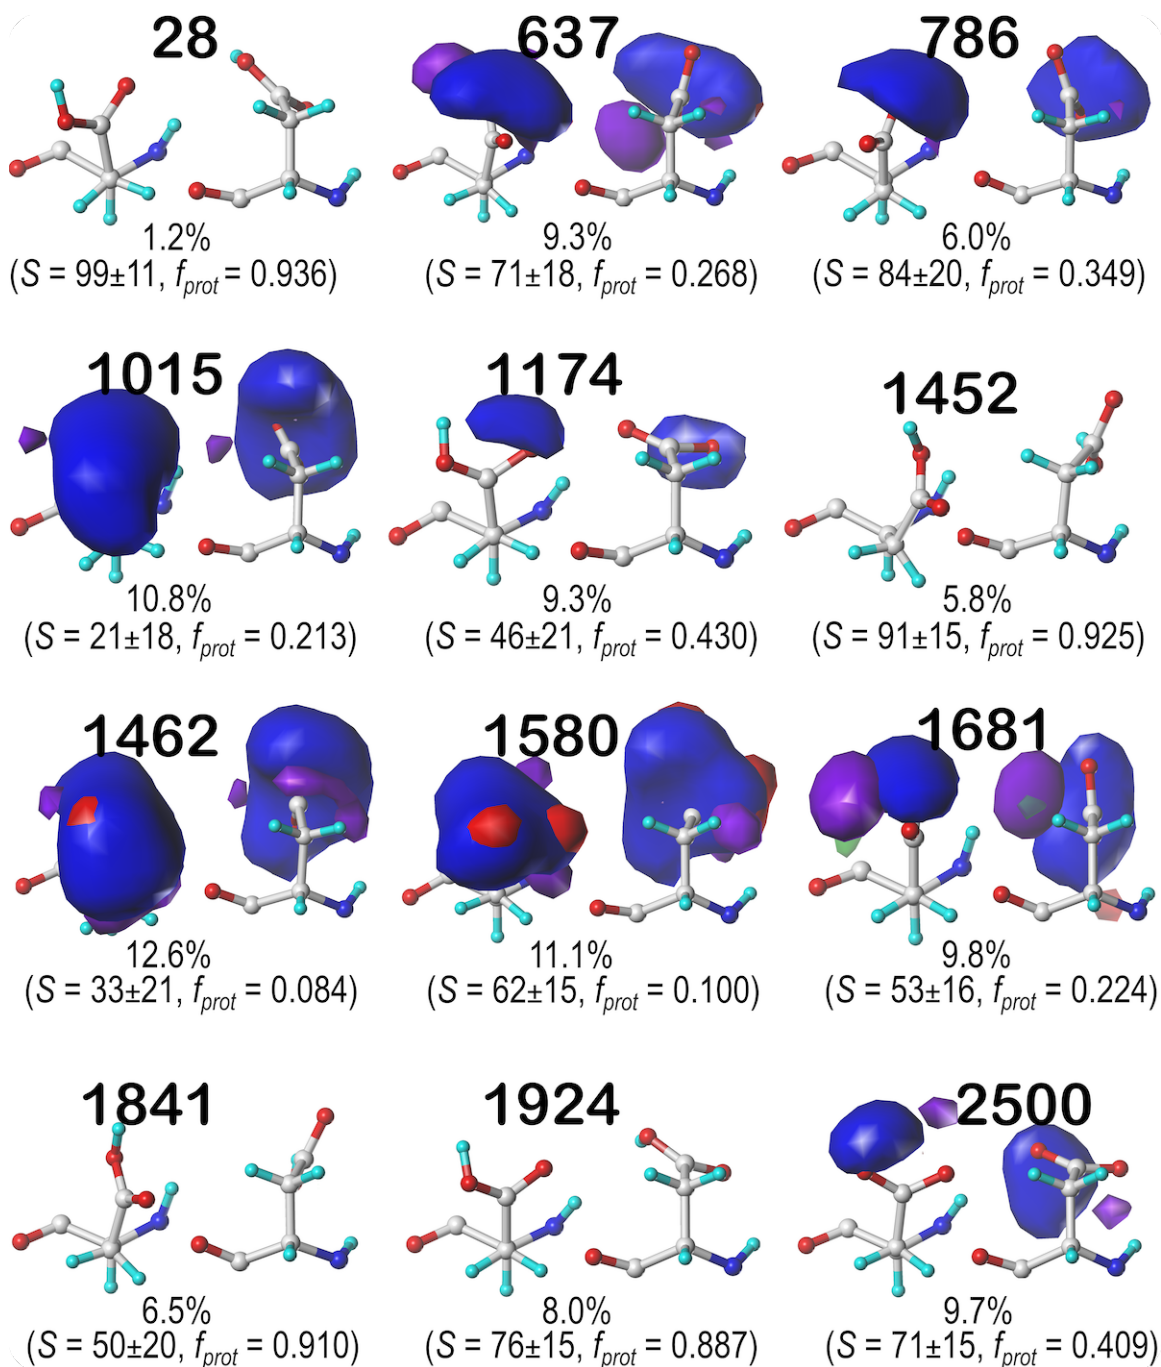

**Figure S1: Hydrophathic interaction maps displaying the Gaussian-weighted average sidechain environments of aspartic acid in the  $\chi_1 = 60^\circ$  parse of the c5 chess square at pH = 3.345.** Two map viewpoints are given for each cluster, whose ID is given in bold. The left map in each pair is oriented such that the CA-CB z-axis bond points upward, while the right is oriented to point it out of the page. The x-axis is oriented horizontally in both. The percentage indicates the fraction of the parse represented by that cluster. S represents the solvent accessible surface area in Å<sup>2</sup>, and  $f_{prot}$  indicates the fraction of the cluster protonated at pH<sub>50</sub>. Blue contours indicate positive polar interactions made with the sidechain, and red indicates negative polar interactions, while green and purple indicate positive and negative hydrophobic interactions, respectively.

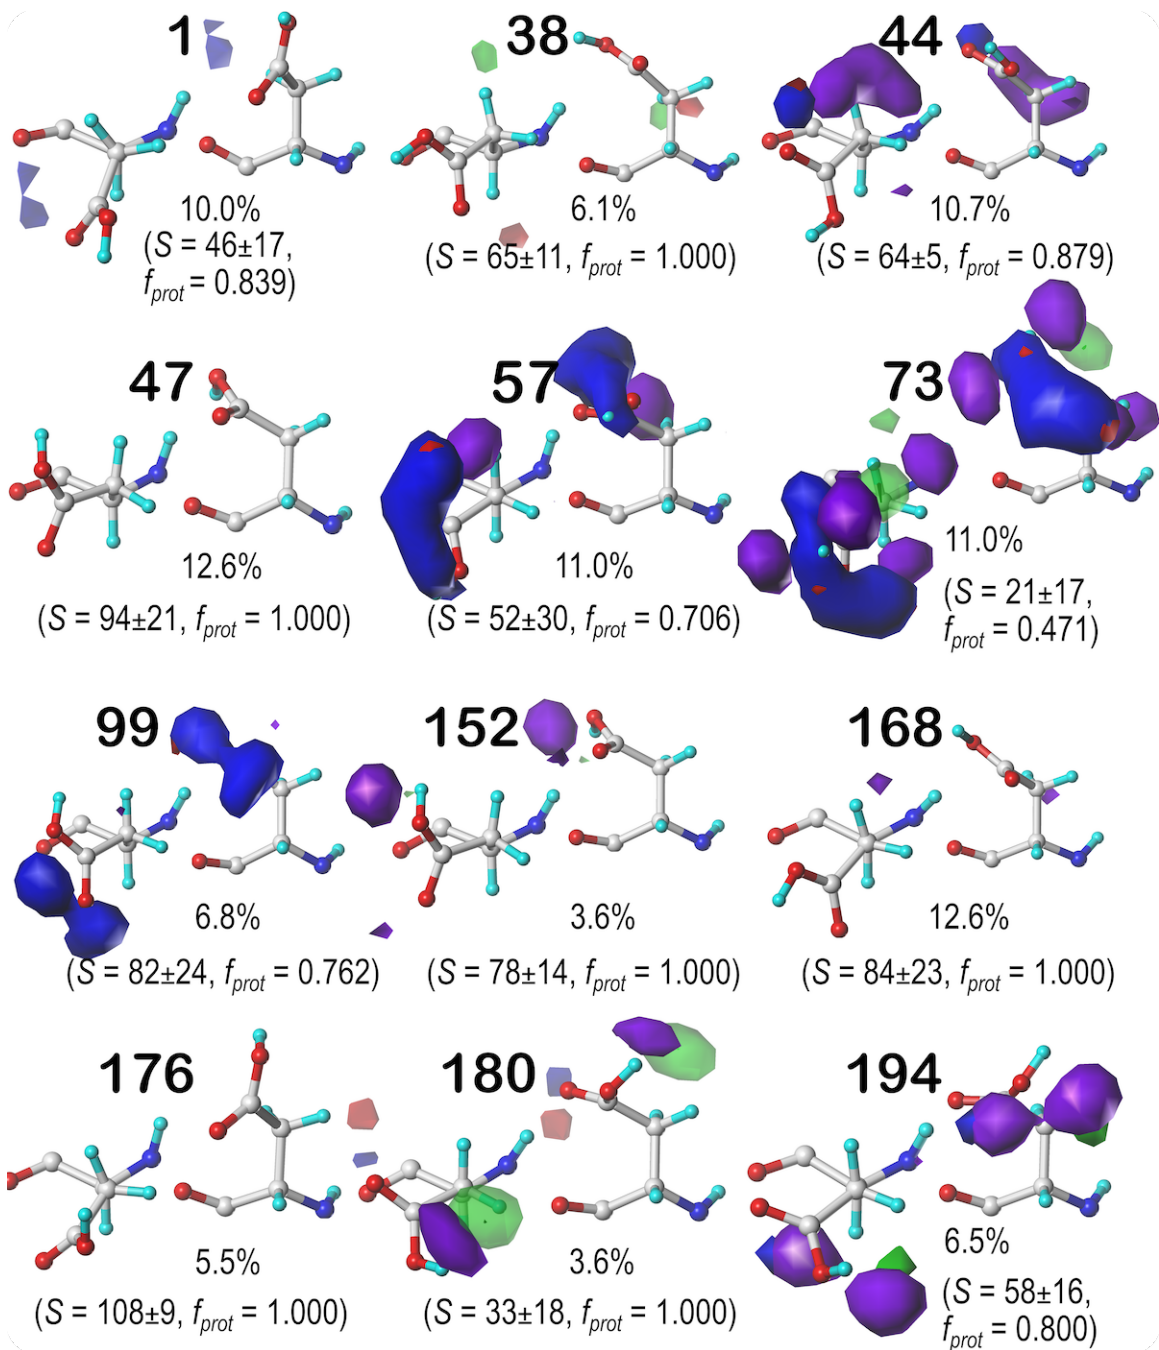

**Figure S2: Hydropathic interaction maps displaying the Gaussian-weighted average sidechain environments of aspartic acid in the  $\chi_1 = 180^\circ$  parse of the c5 chess square at pH = 3.345. See caption for Figure S1.**

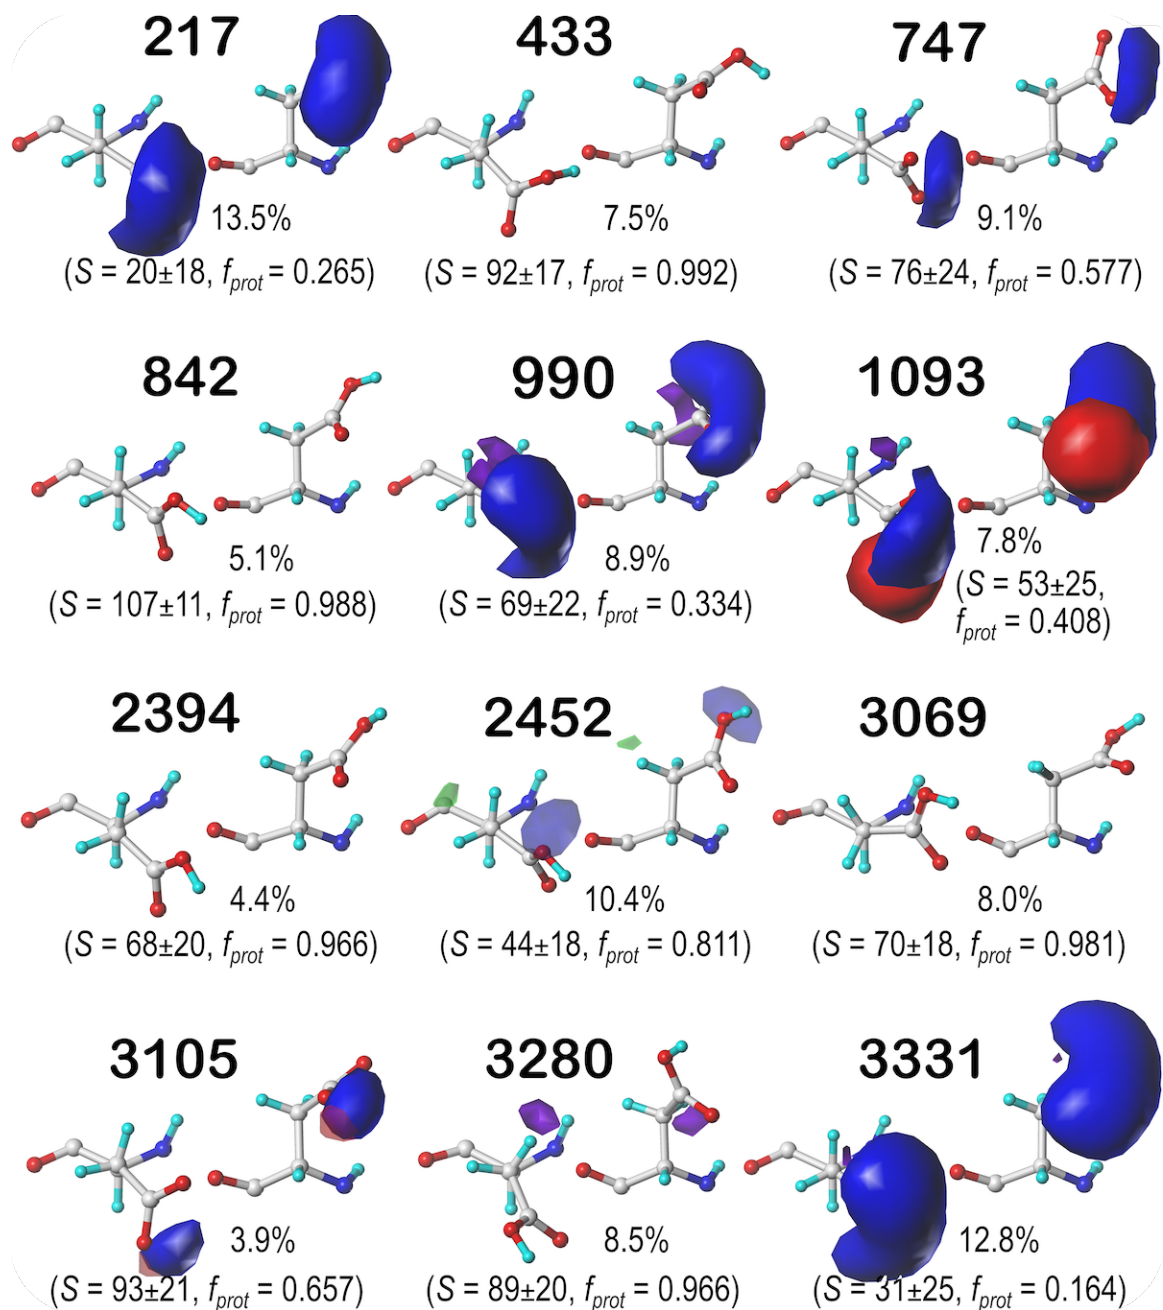

**Figure S3: Hydrophobic interaction maps displaying the Gaussian-weighted average sidechain environments of aspartic acid in the  $\chi_1 = 300^\circ$  parse of the c5 chess square at pH = 3.345. See caption for Figure S1.**

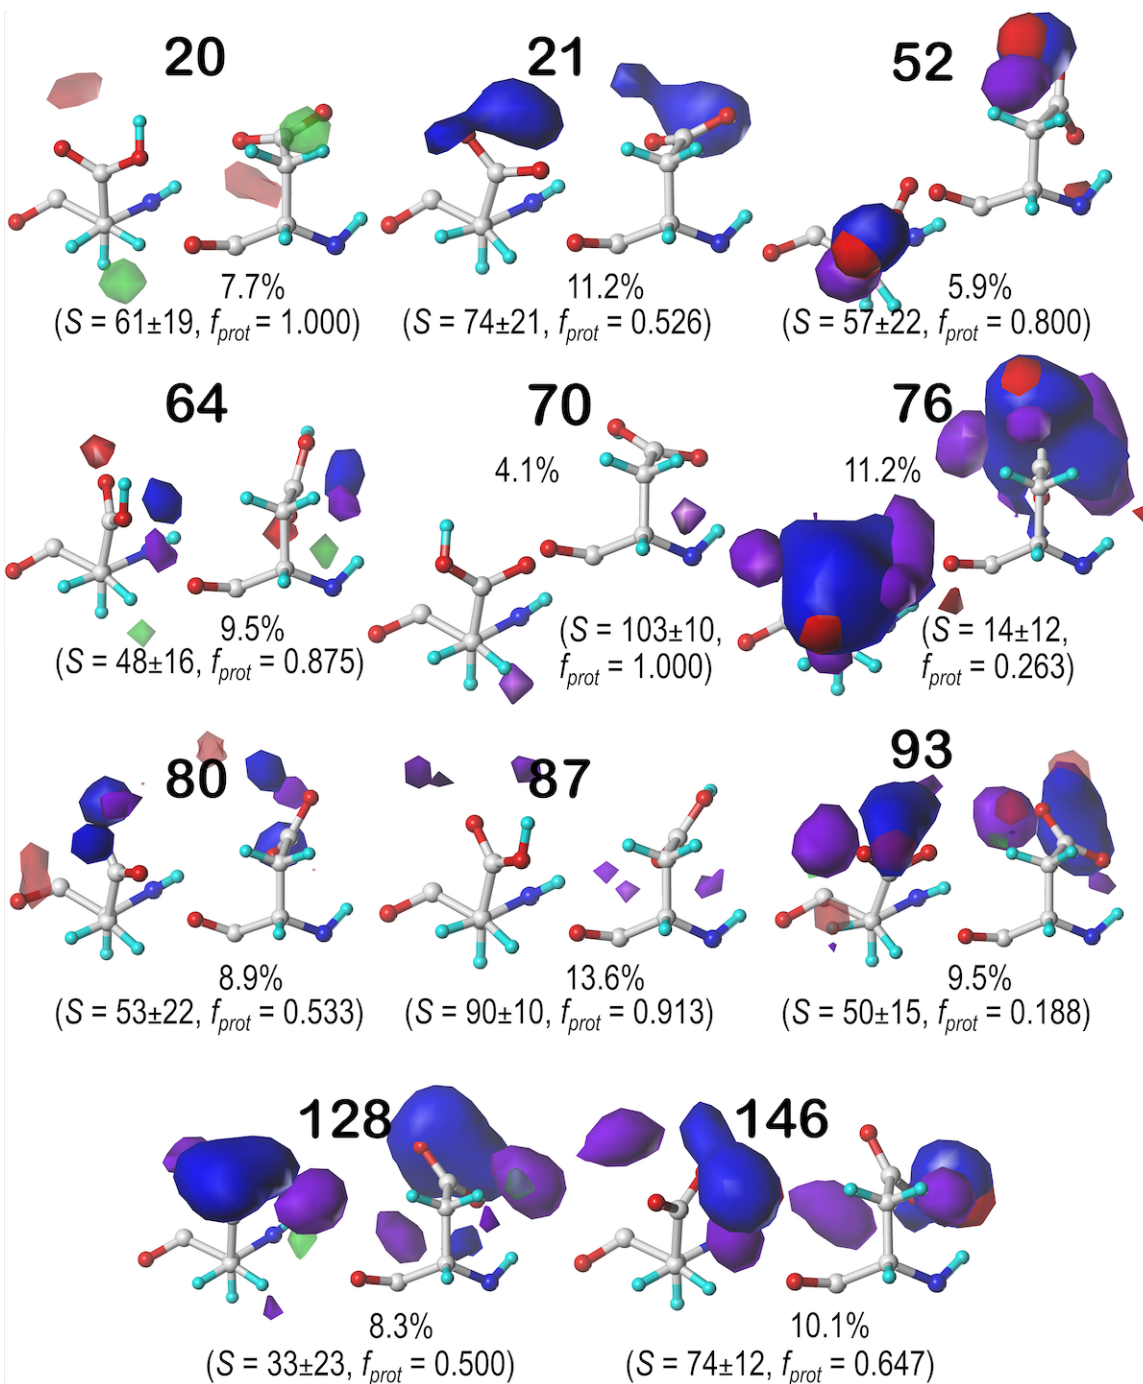

**Figure S4: Hydropathic interaction maps displaying the Gaussian-weighted average sidechain environments of aspartic acid in the  $\chi_1 = 60^\circ$  parse of the  $d5$  chess square at pH = 3.345. See caption for Figure S1.**

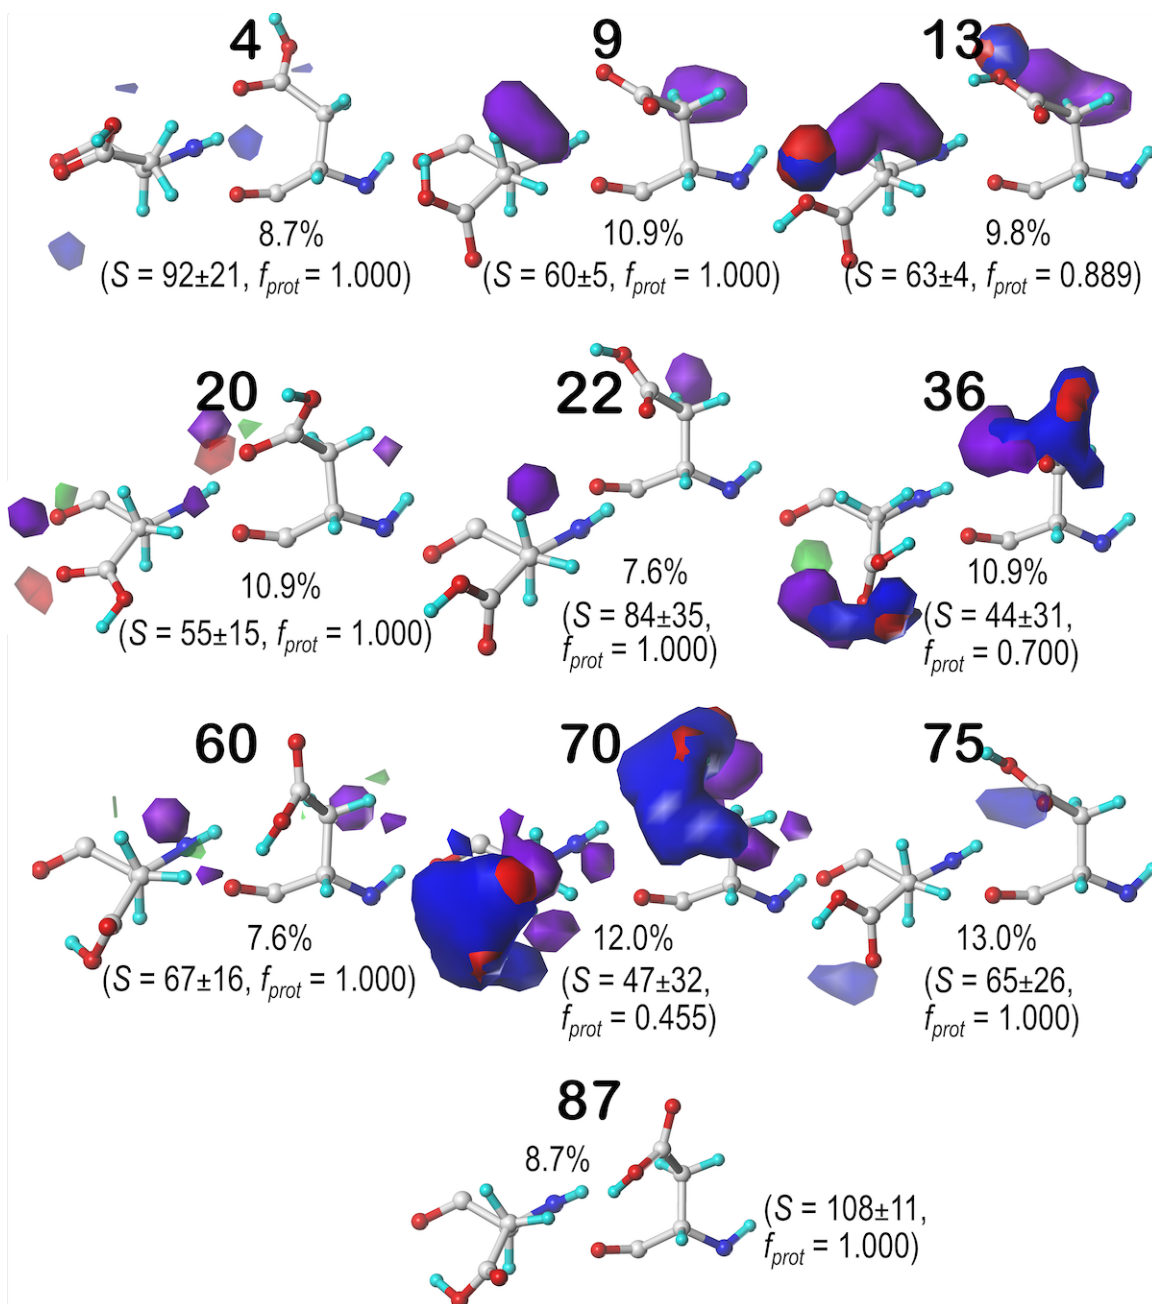

**Figure S5: Hydrophobic interaction maps displaying the Gaussian-weighted average sidechain environments of aspartic acid in the  $\chi_1 = 180^\circ$  parse of the *d5* chess square at pH = 3.345. See caption for Figure S1.**

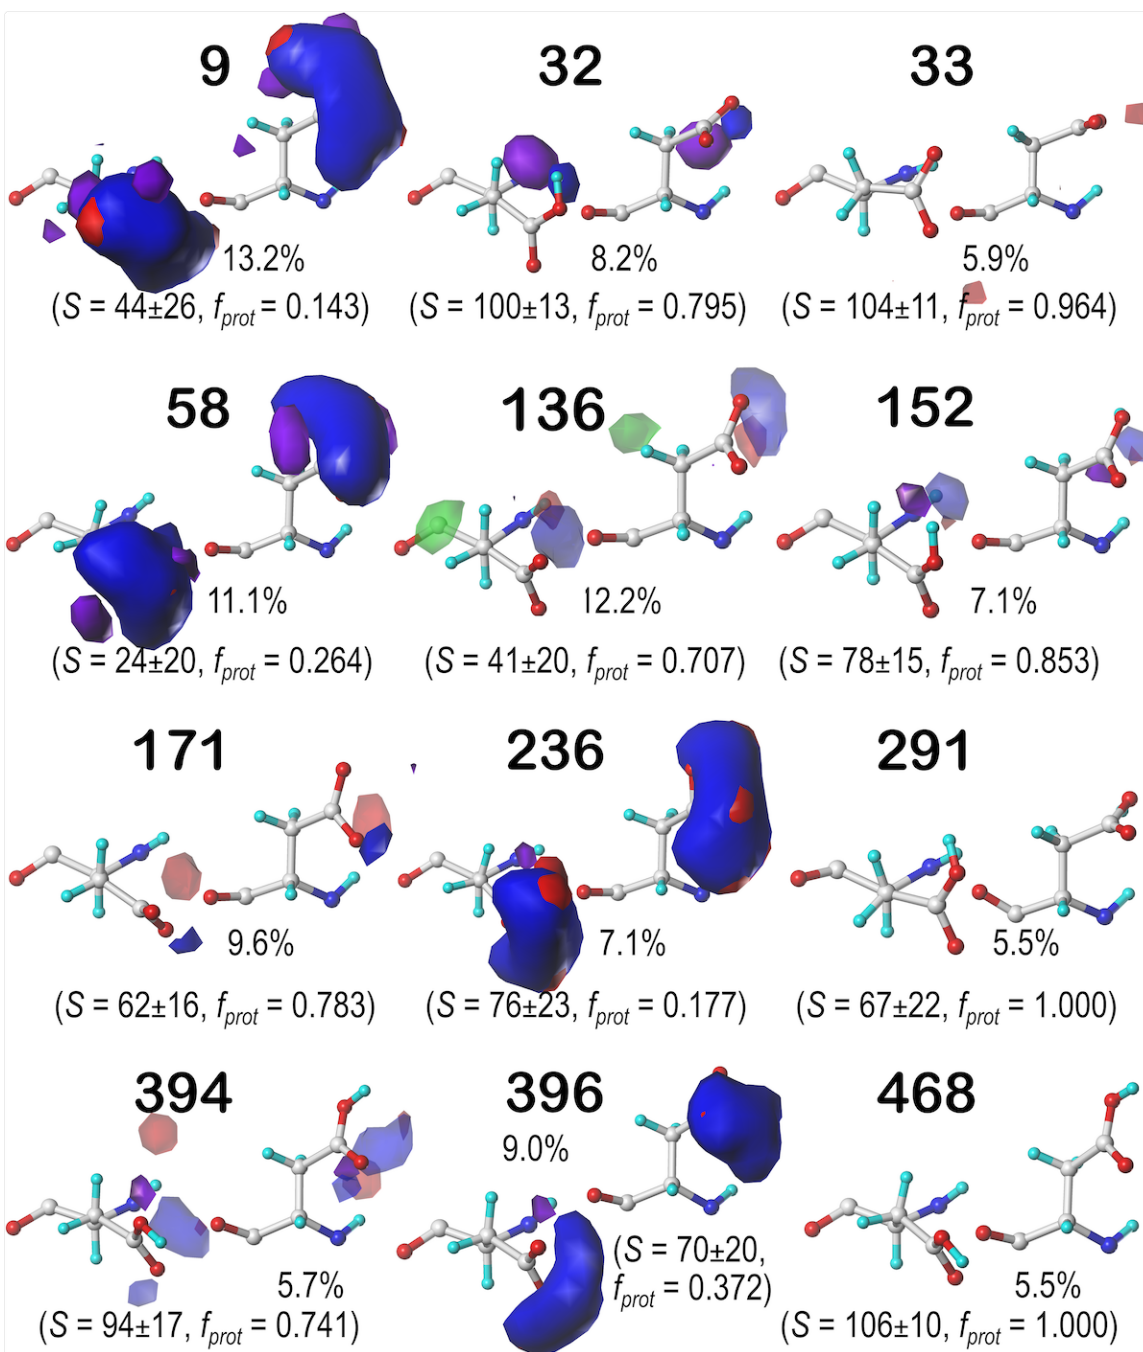

**Figure S6: Hydrophobic interaction maps displaying the Gaussian-weighted average sidechain environments of aspartic acid in the  $\chi_1 = 300^\circ$  parse of the *d5* chess square at pH = 3.345. See caption for Figure S1.**



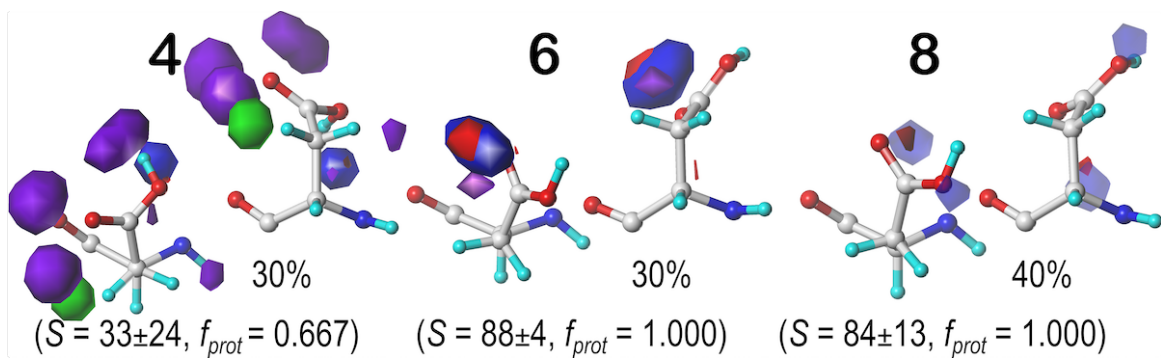

**Figure S7: Hydropathic interaction maps displaying the Gaussian-weighted average sidechain environments of aspartic acid in the  $\chi_1 = 60^\circ$  parse of the *f6* chess square at pH = 3.345. See caption for Figure S1.**

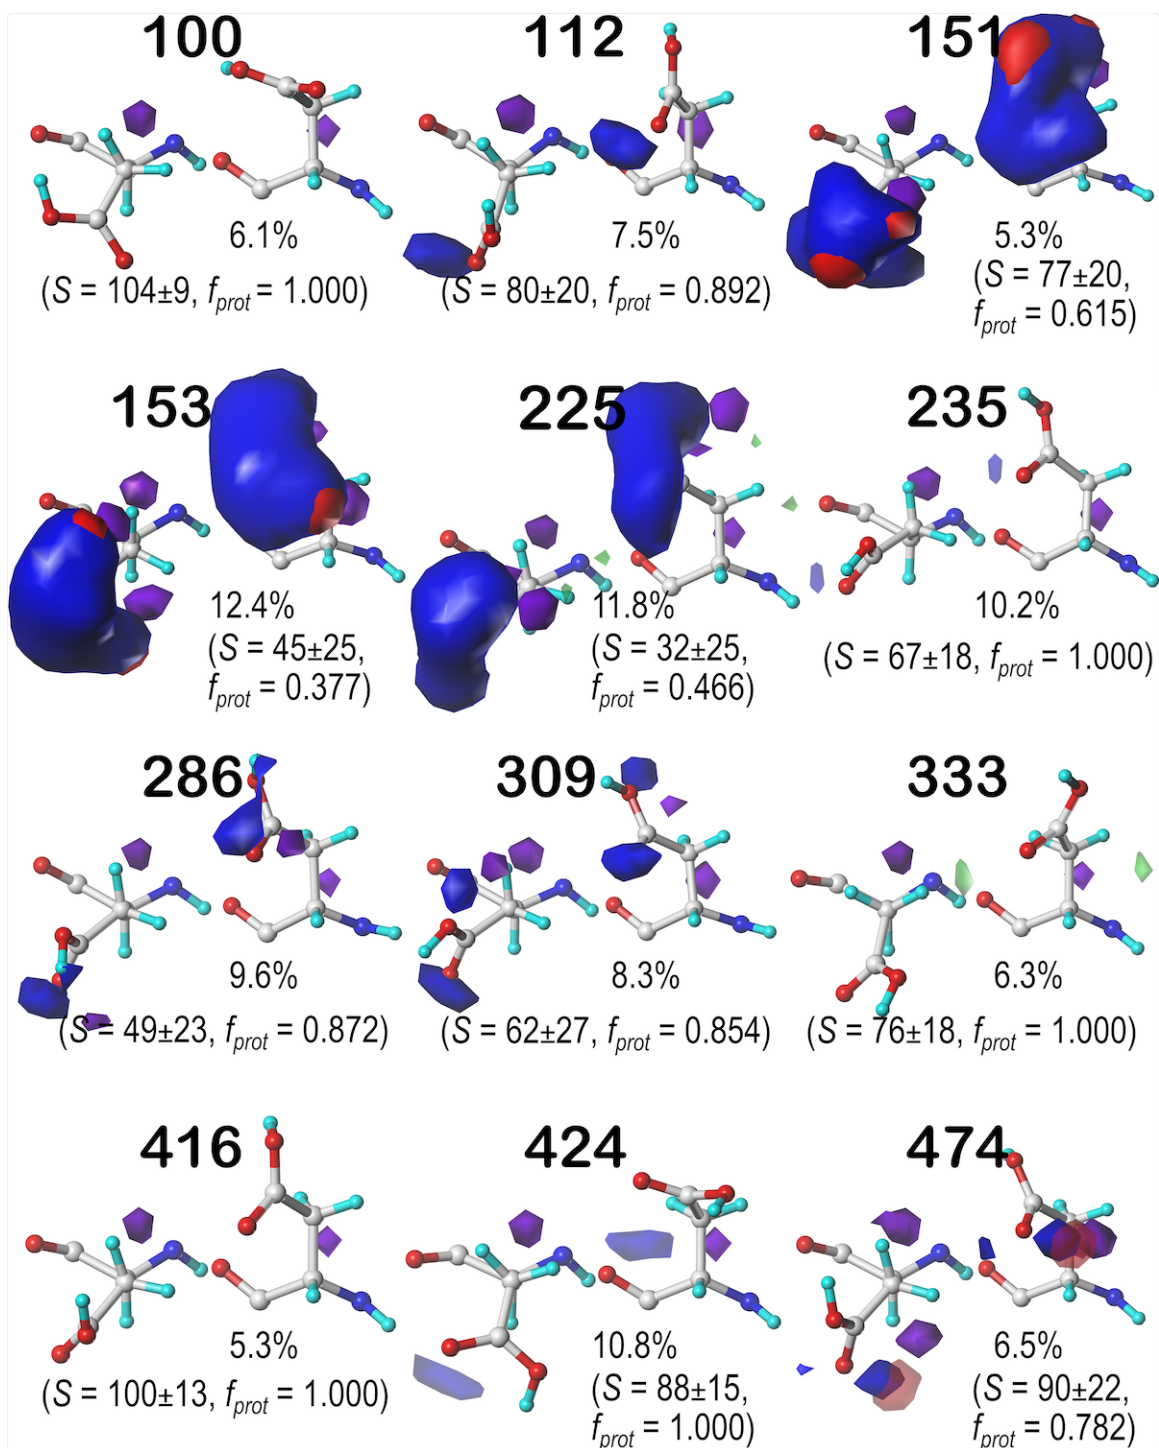

**Figure S8: Hydrophobic interaction maps displaying the Gaussian-weighted average sidechain environments of aspartic acid in the  $\chi_1 = 180^\circ$  parse of the *f6* chess square at pH = 3.345. See caption for Figure S1.**

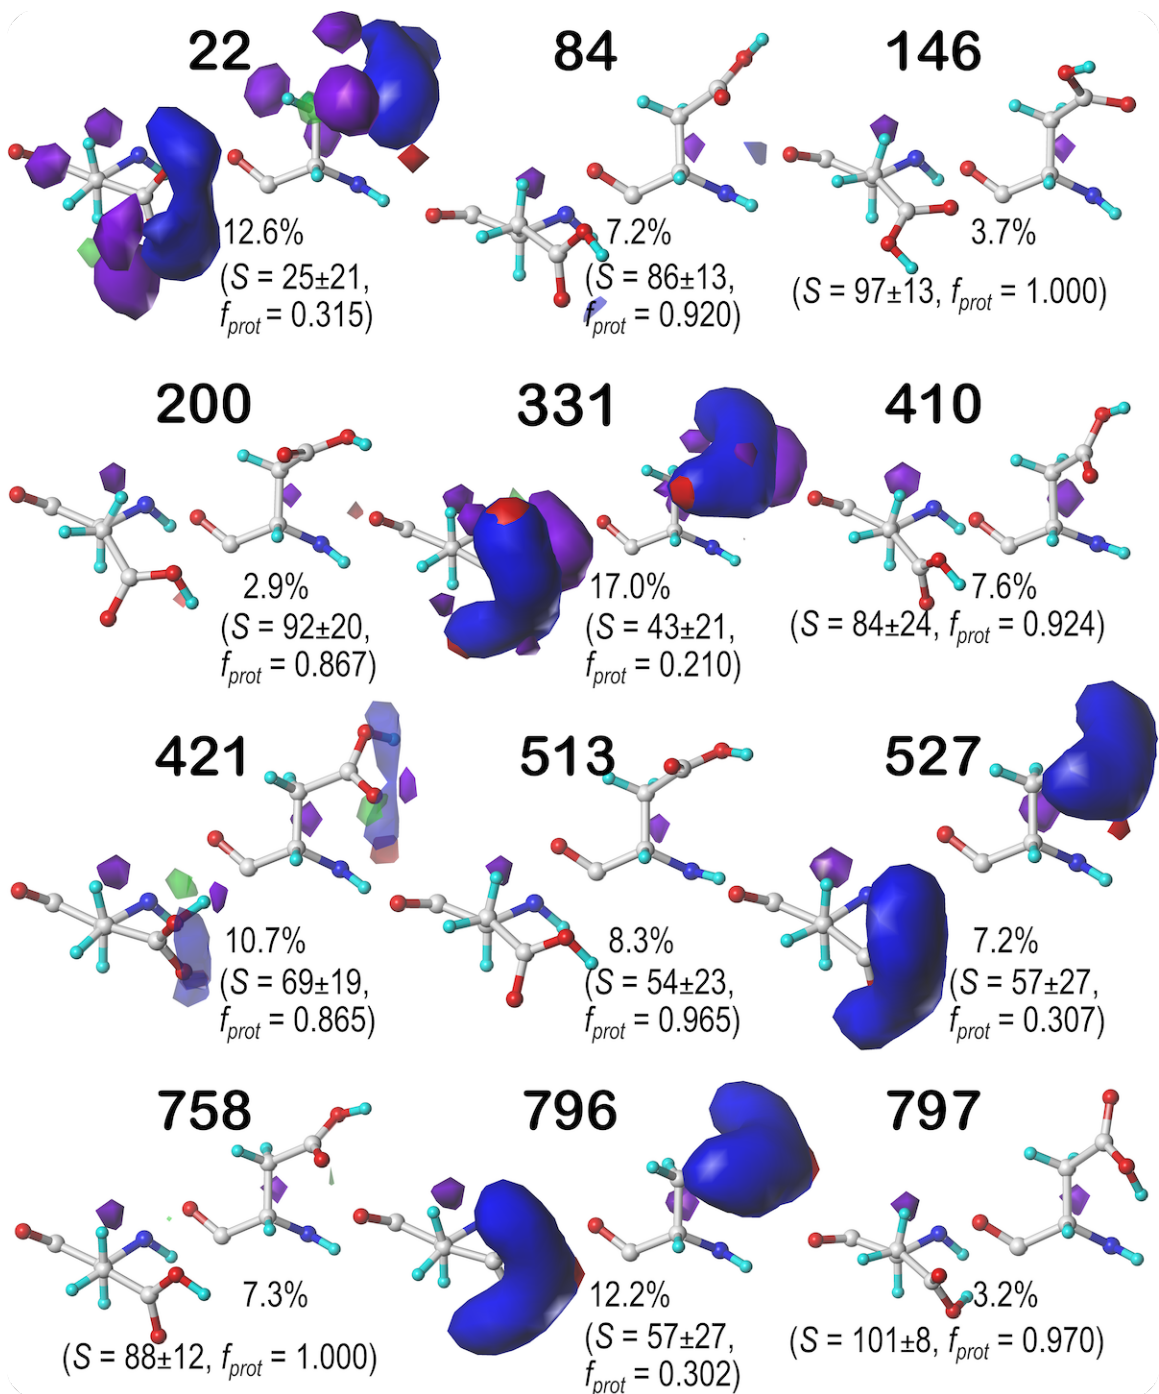

**Figure S9: Hydrophobic interaction maps displaying the Gaussian-weighted average sidechain environments of aspartic acid in the  $\chi_1 = 300^\circ$  parse of the *f6* chess square at pH = 3.345. See caption for Figure S1.**

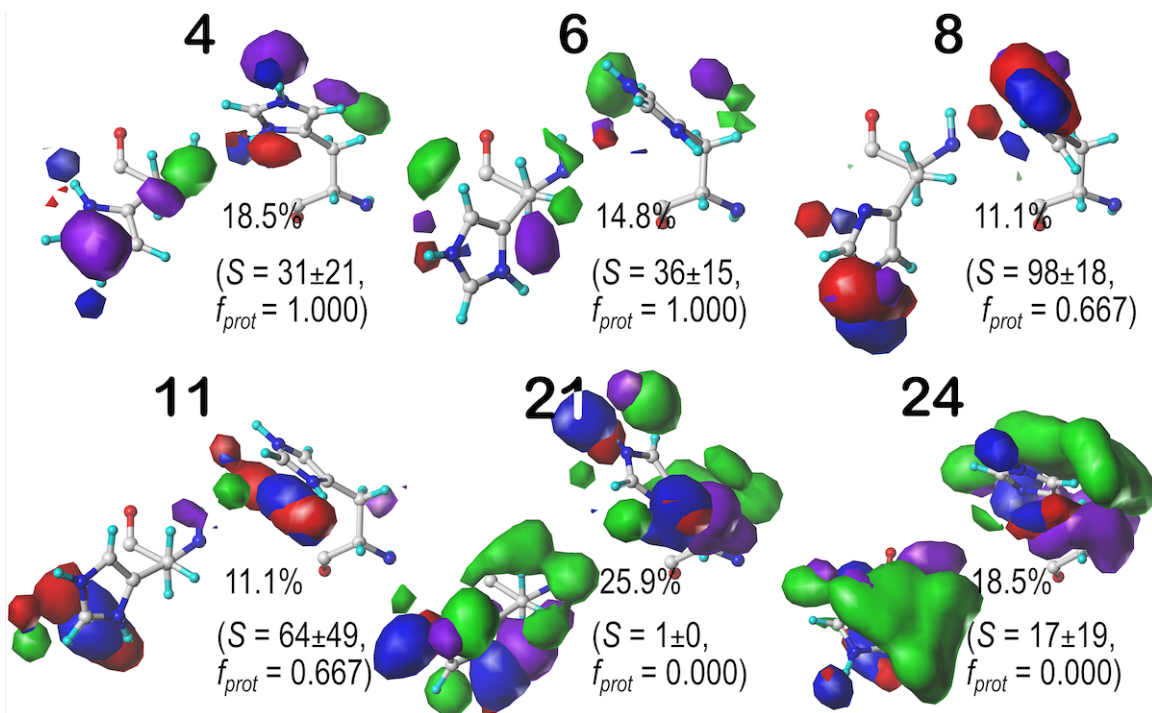

**Figure S10: Hydropathic interaction maps displaying the Gaussian-weighted average sidechain environments of histidine in the  $\chi_1 = 180^\circ$  parse of the *b1* chess square at pH = 5.174. See caption for Figure S1.**

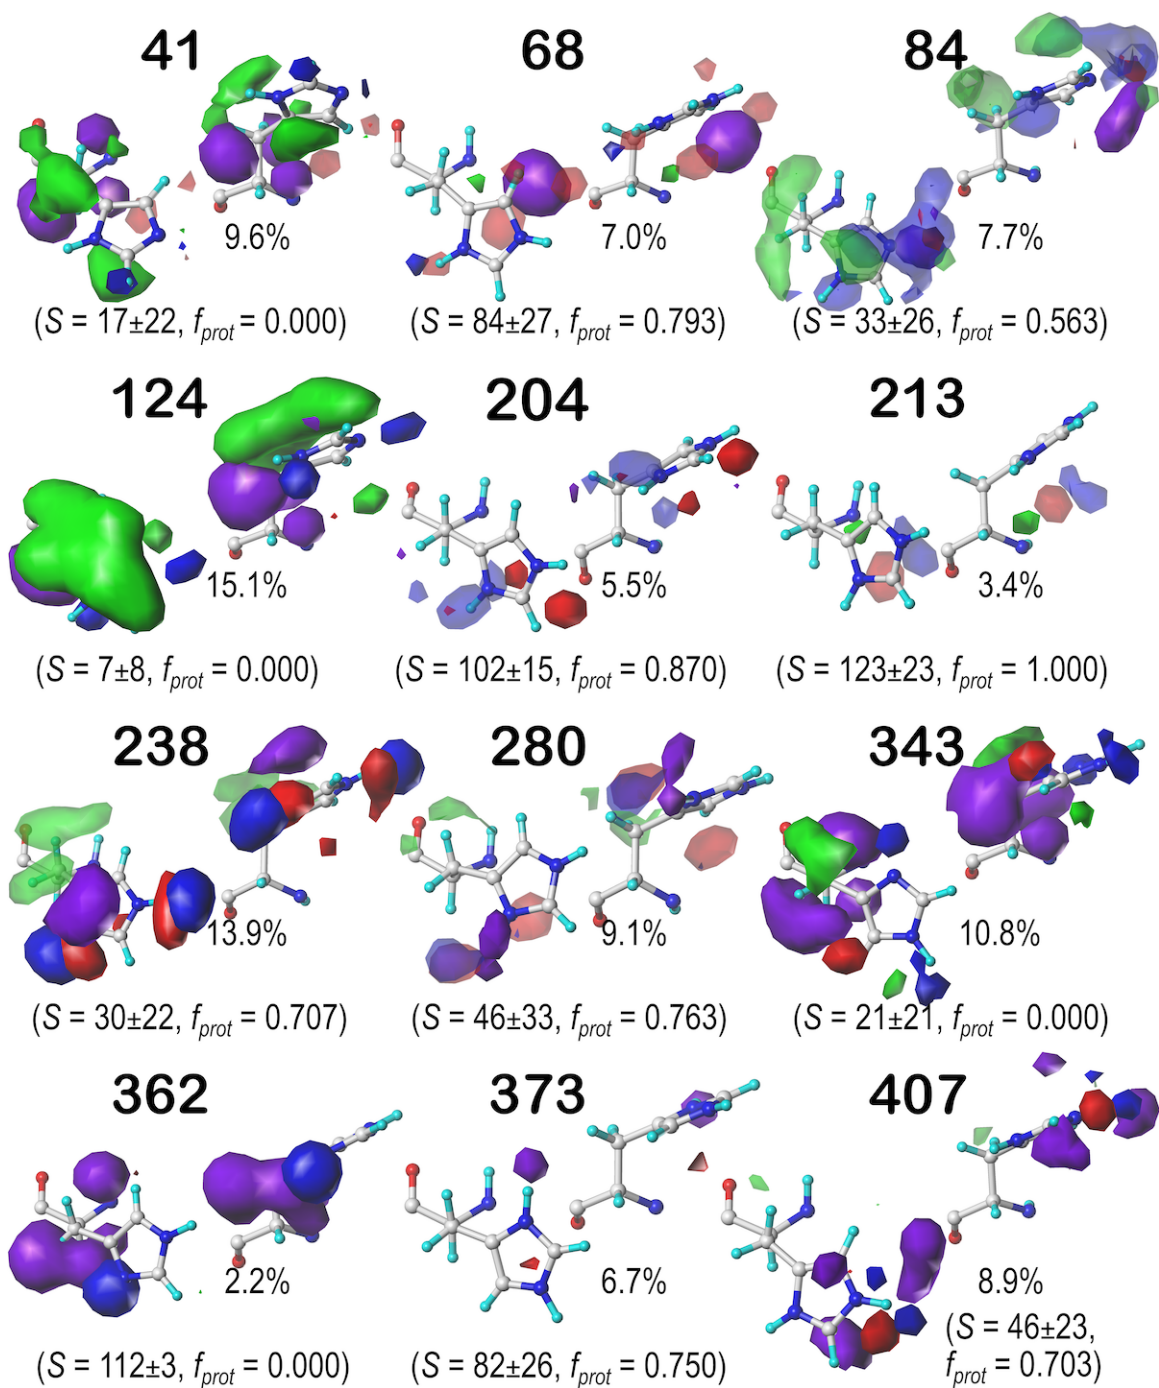

**Figure S11: Hydropathic interaction maps displaying the Gaussian-weighted average sidechain environments of histidine in the  $\chi_1 = 300^\circ$  parse of the *b1* chess square at pH = 5.174. See caption for Figure S1.**

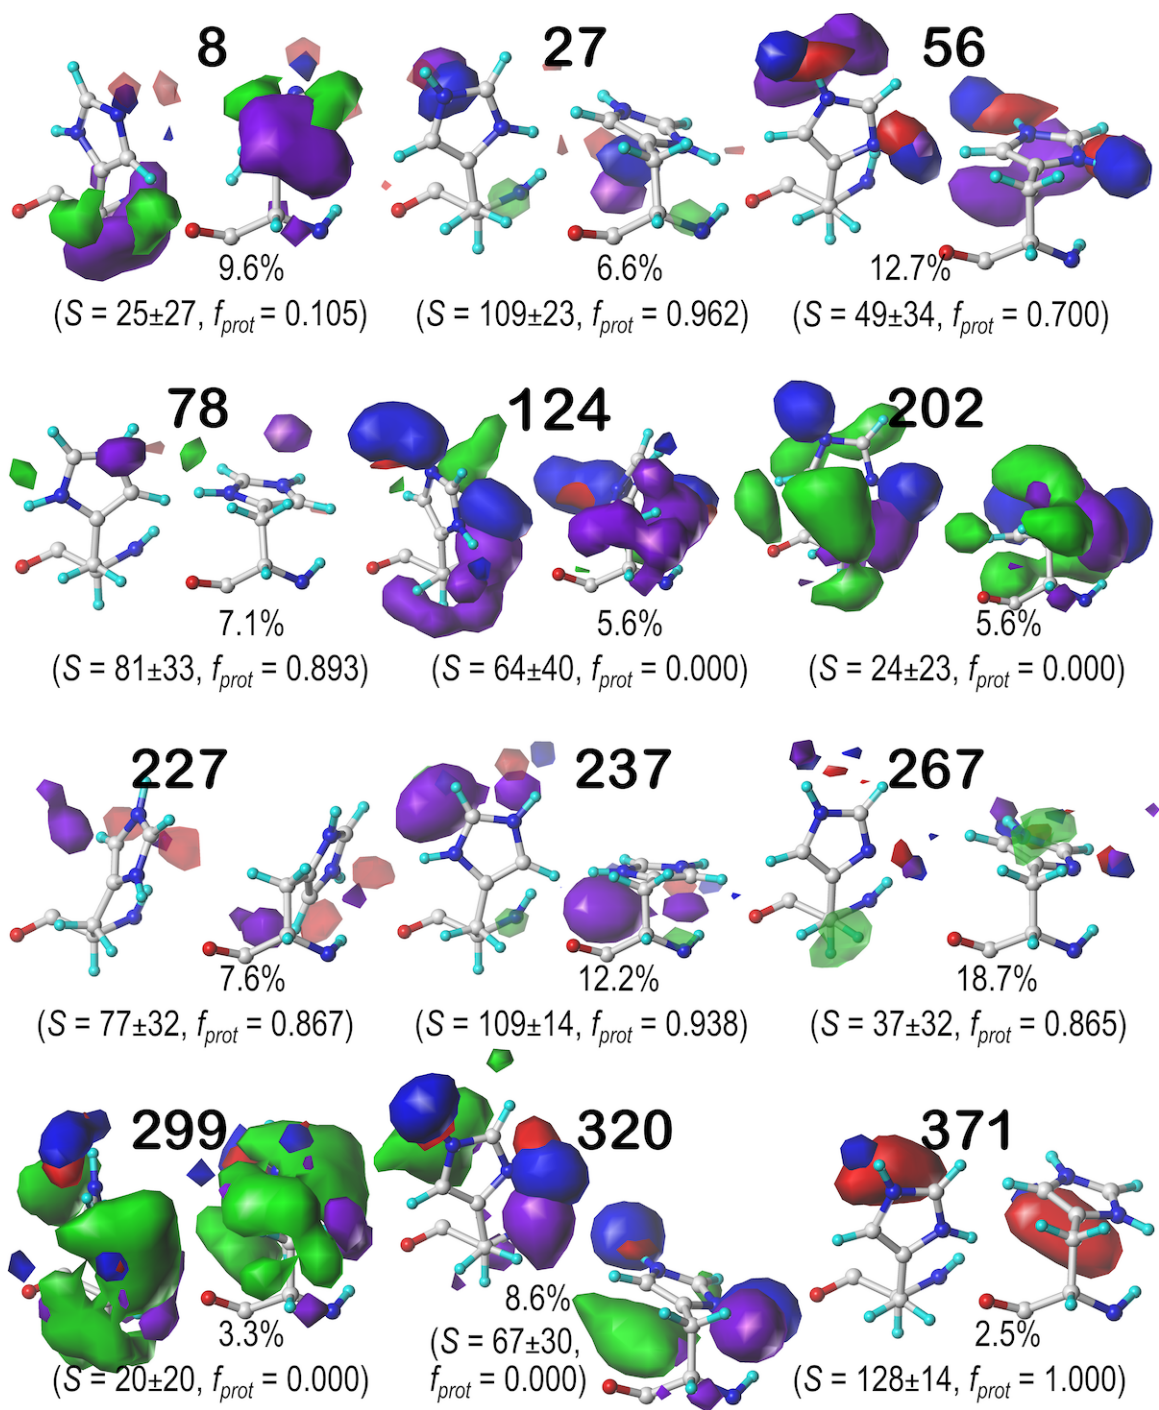

**Figure S12: Hydrophobic interaction maps displaying the Gaussian-weighted average sidechain environments of histidine in the  $\chi_1 = 60^\circ$  parse of the c5 chess square at pH = 5.174. See caption for Figure S1.**

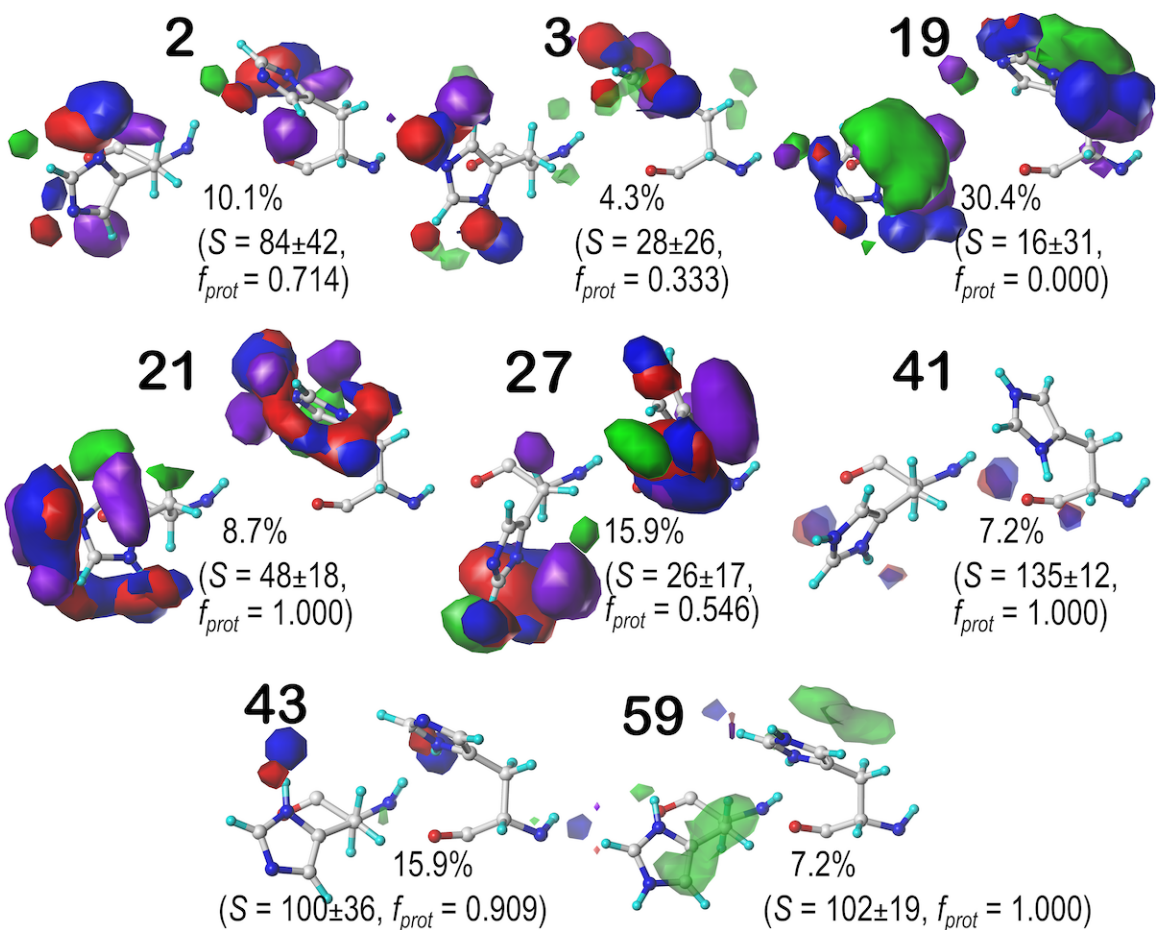

**Figure S13: Hydrophobic interaction maps displaying the Gaussian-weighted average sidechain environments of histidine in the  $\chi_1 = 180^\circ$  parse of the c5 chess square at pH = 5.174. See caption for Figure S1.**

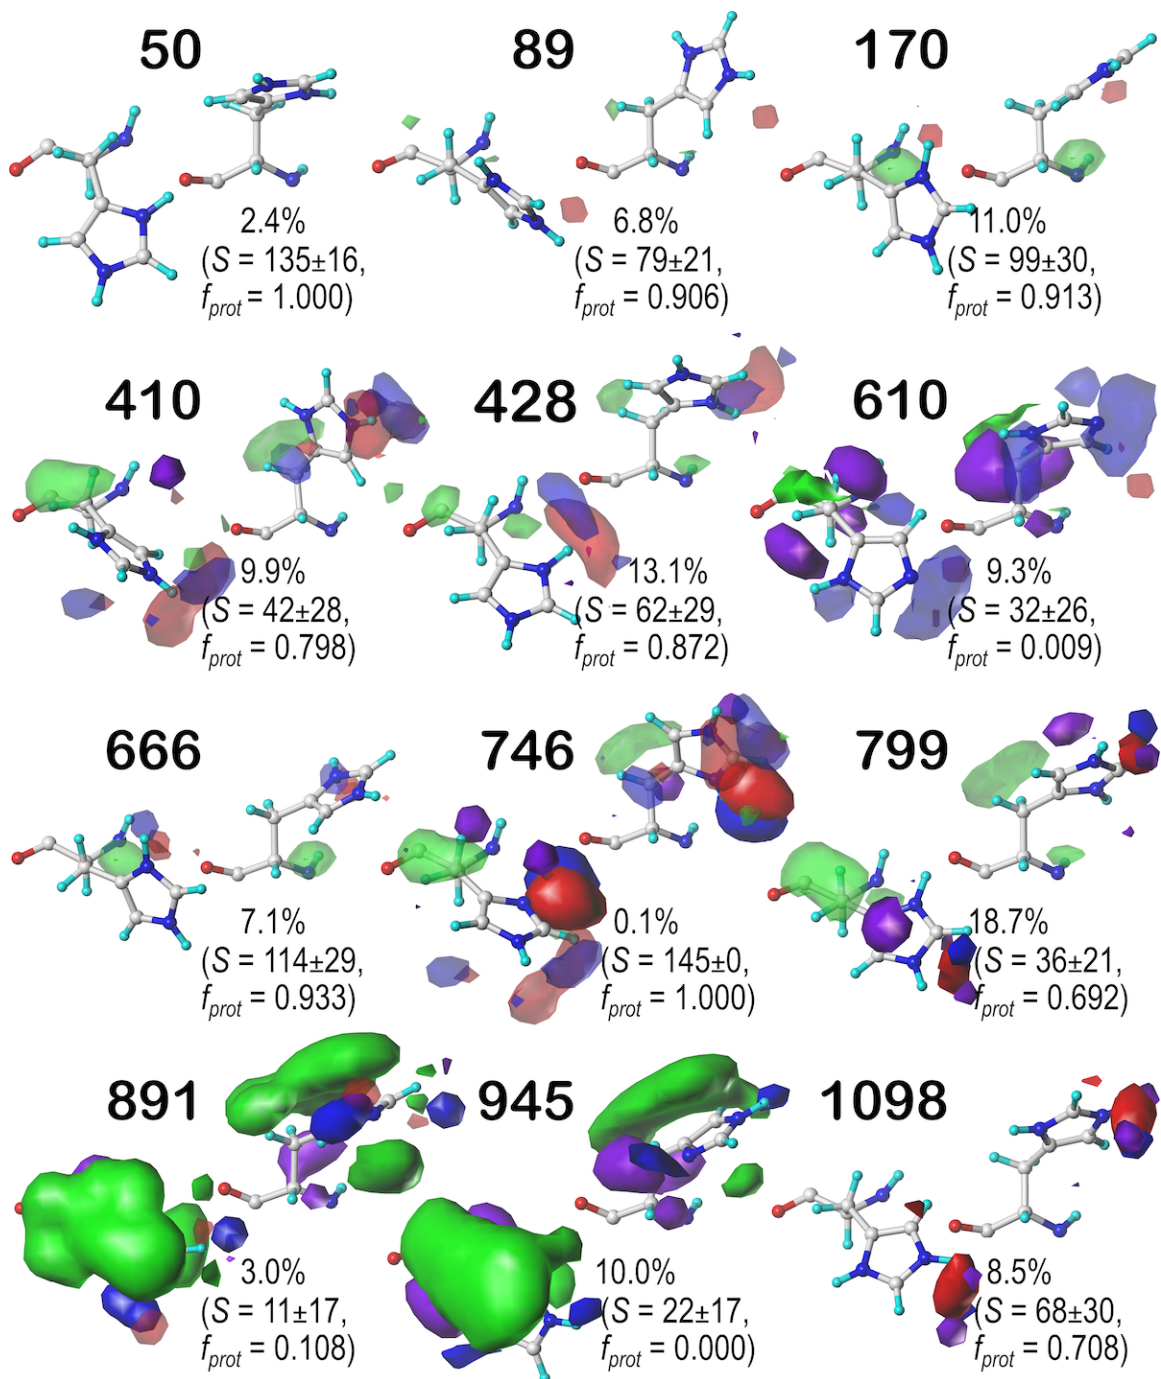

**Figure S14: Hydrophobic interaction maps displaying the Gaussian-weighted average sidechain environments of histidine in the  $\chi_1 = 300^\circ$  parse of the *c5* chess square at pH = 5.174. See caption for Figure S1.**



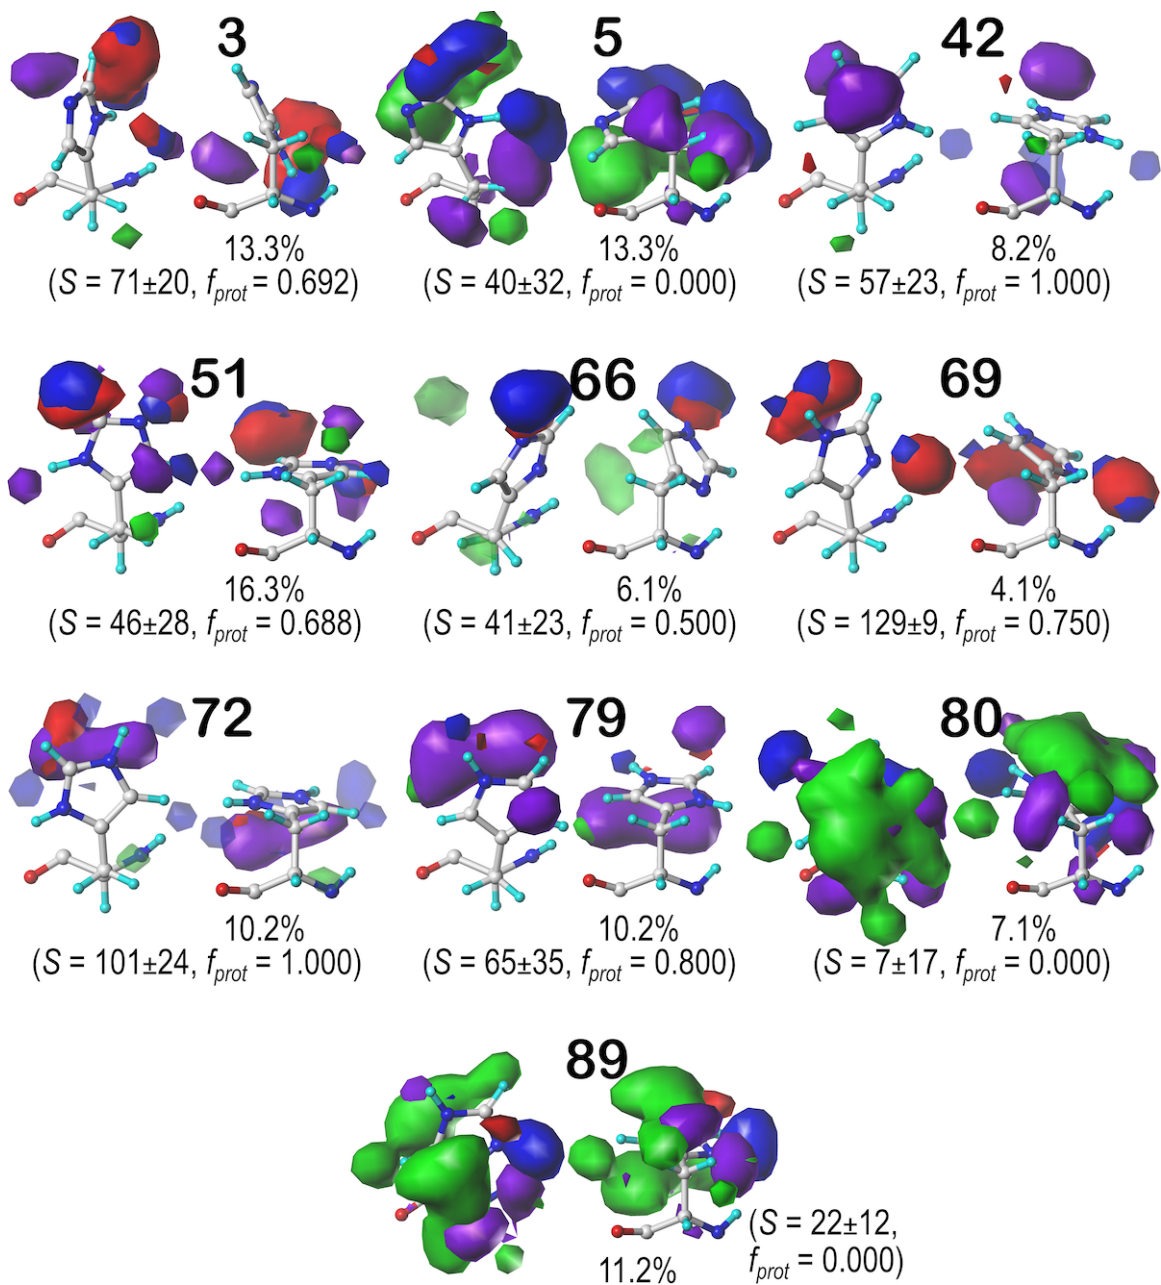

**Figure S15: Hydrophobic interaction maps displaying the Gaussian-weighted average sidechain environments of histidine in the  $\chi_1 = 60^\circ$  parse of the *d5* chess square at pH = 5.174. See caption for Figure S1.**

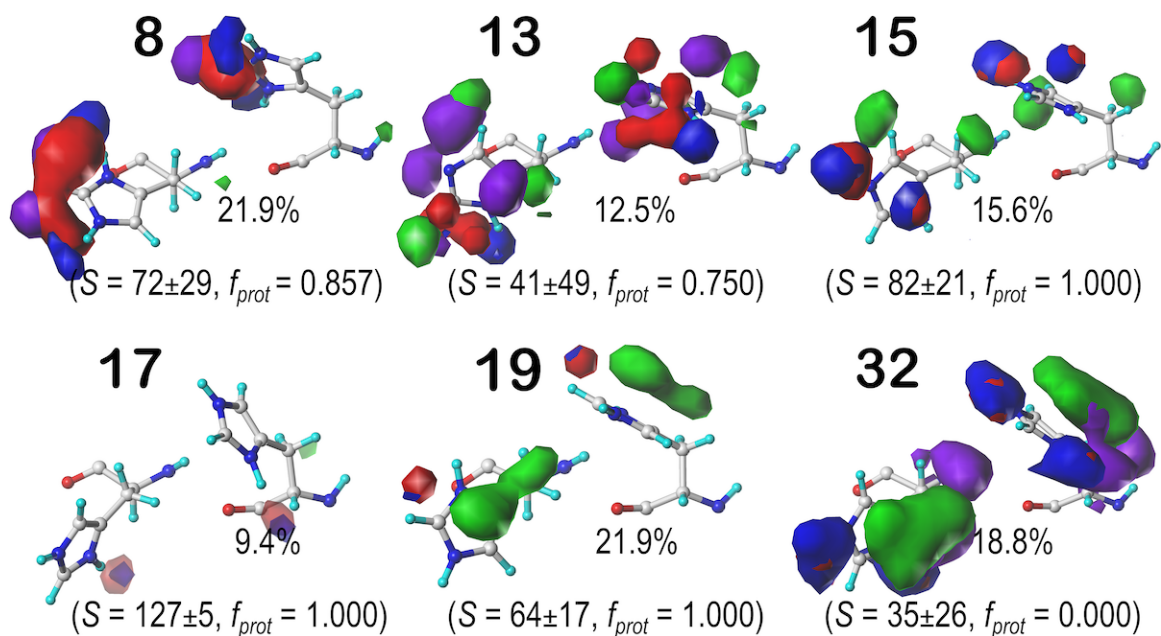

**Figure S16: Hydropathic interaction maps displaying the Gaussian-weighted average sidechain environments of histidine in the  $\chi_1 = 180^\circ$  parse of the *d5* chess square at pH = 5.174. See caption for Figure S1.**

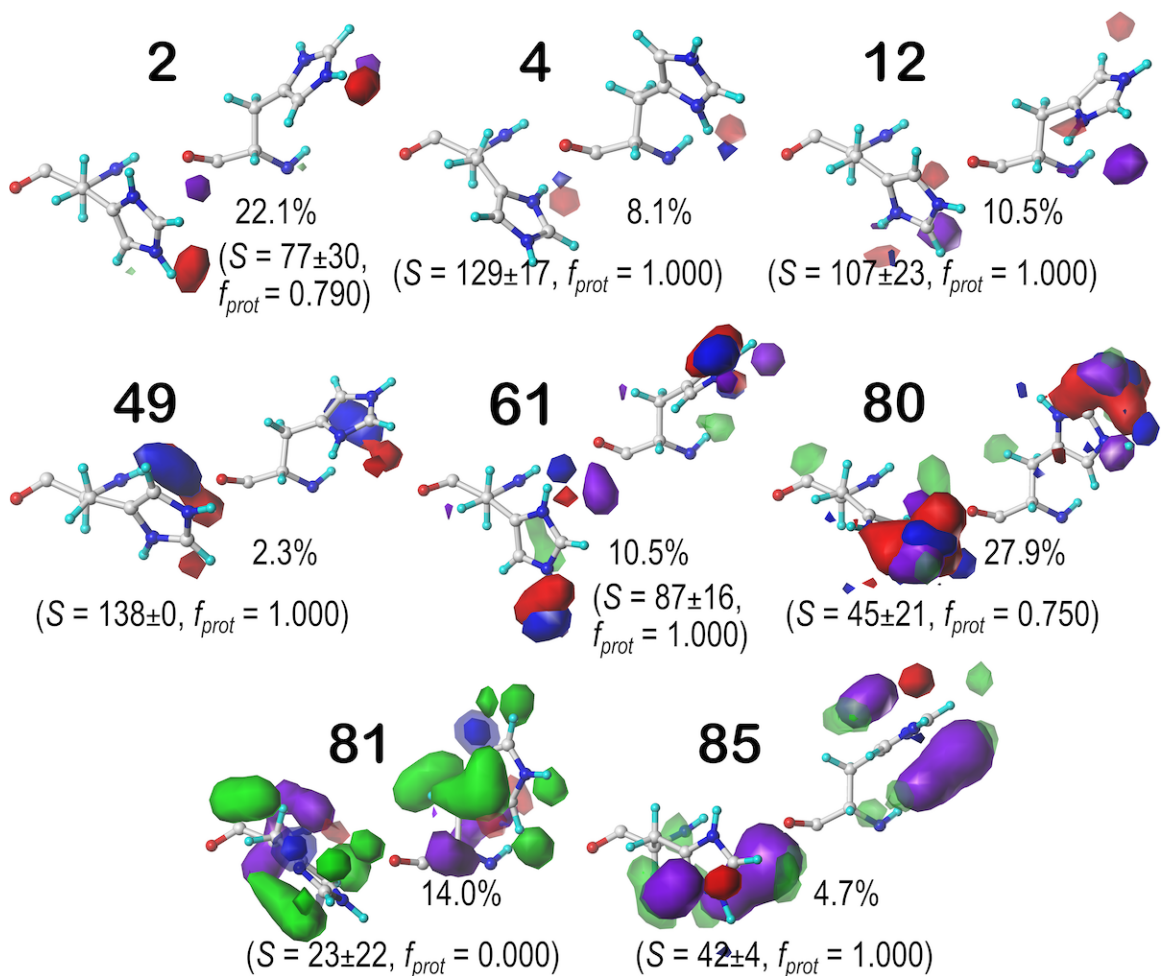

**Figure S17: Hydropathic interaction maps displaying the Gaussian-weighted average sidechain environments of histidine in the  $\chi_1 = 300^\circ$  parse of the *d5* chess square at pH = 5.174. See caption for Figure S1.**

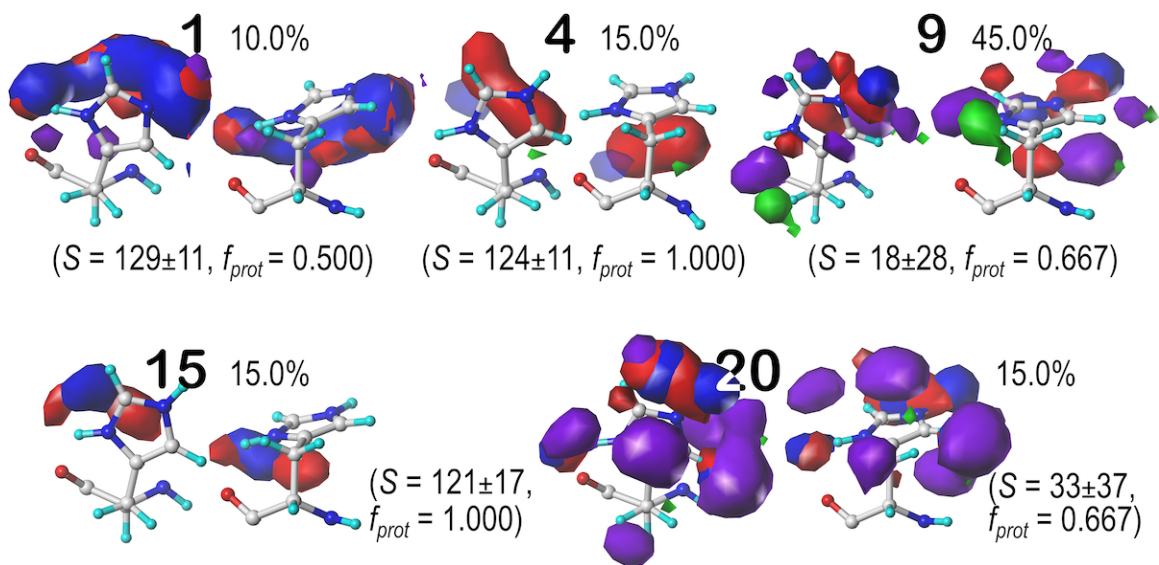

**Figure S18: Hydropathic interaction maps displaying the Gaussian-weighted average sidechain environments of histidine in the  $\chi_1 = 60^\circ$  parse of the *f6* chess square at pH = 5.174. See caption for Figure S1.**

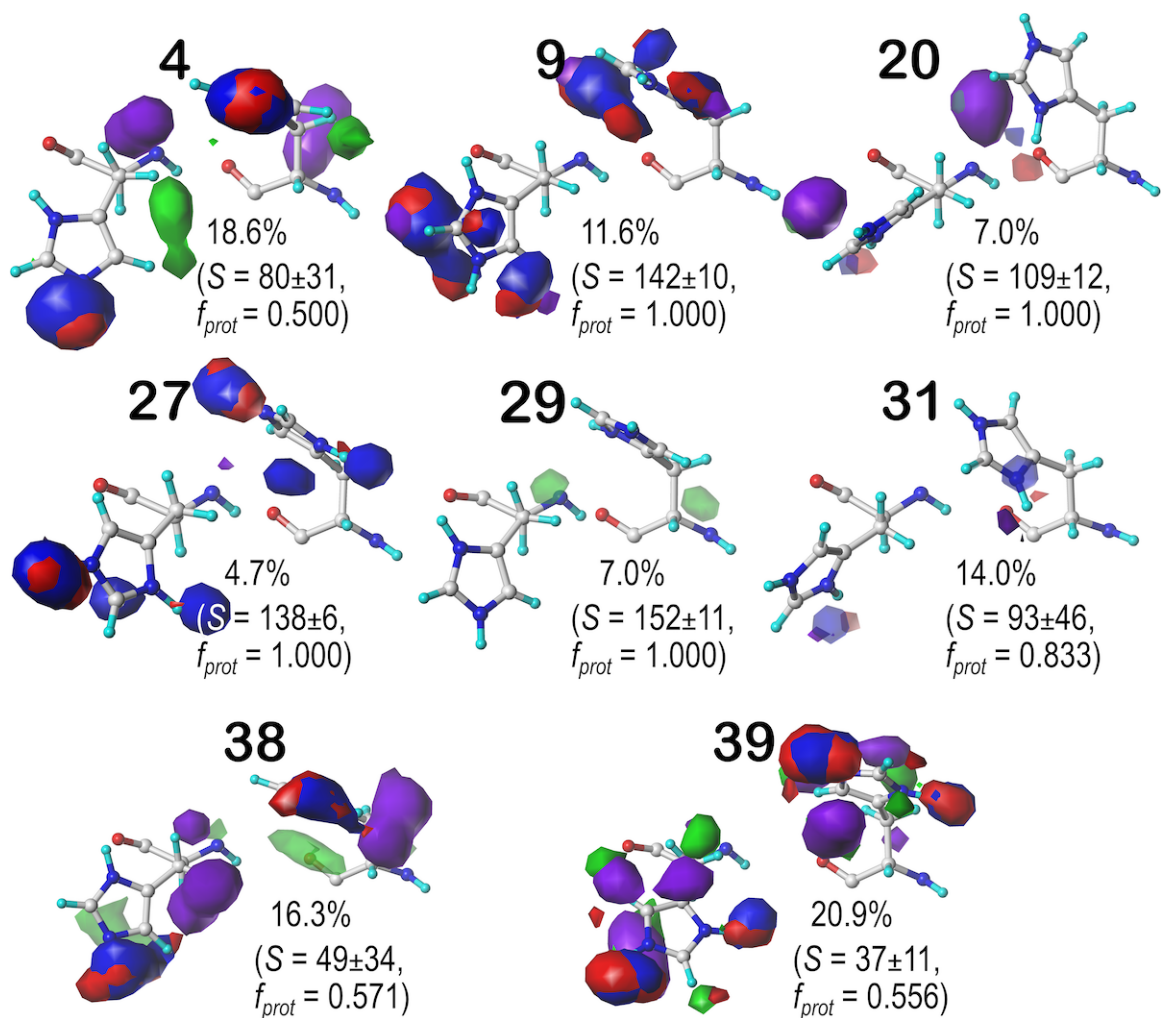

**Figure S19: Hydrophobic interaction maps displaying the Gaussian-weighted average sidechain environments of histidine in the  $\chi_1 = 180^\circ$  parse of the *f6* chess square at pH = 5.174. See caption for Figure S1.**

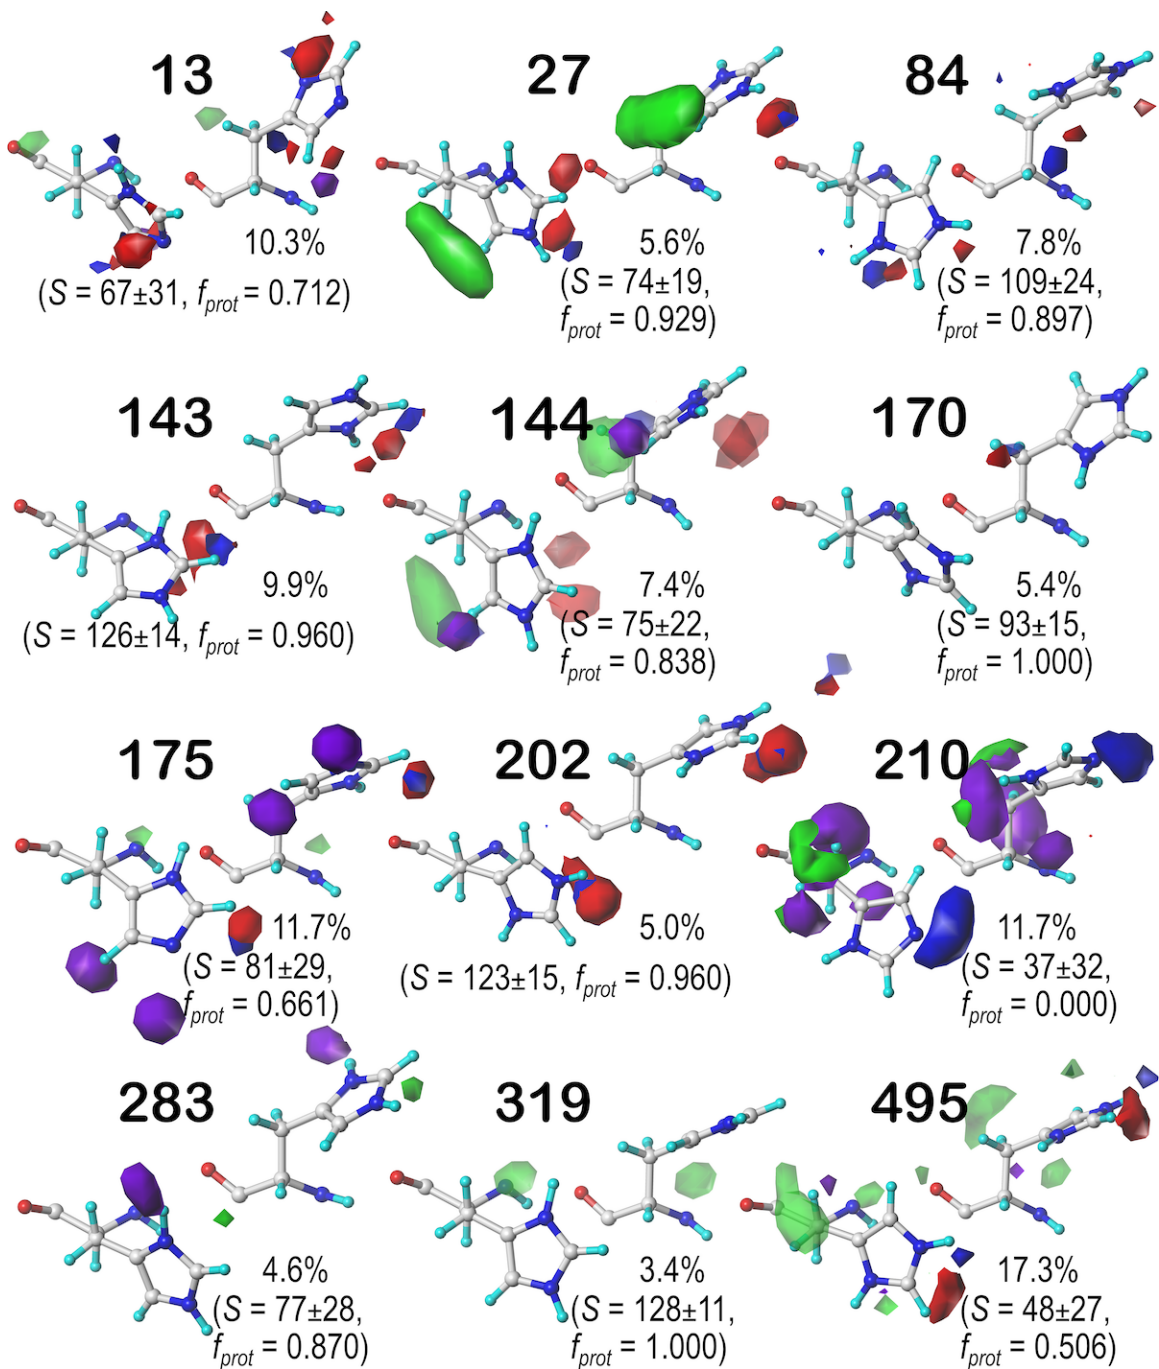

**Figure S20: Hydrophobic interaction maps displaying the Gaussian-weighted average sidechain environments of histidine in the  $\chi_1 = 300^\circ$  parse of the *f6* chess square at pH = 5.174. See caption for Figure S1.**

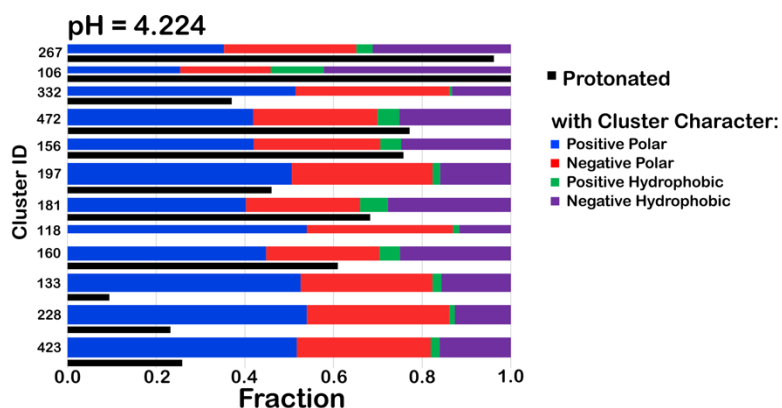

**Figure S21: Character interaction chart for the GLU *b1.300.180* parse at pH 4.224.** The fraction of each interaction type is given on the x-axis, for each cluster ID on the y-axis. The bars are arranged such that, descending, clusters have smaller SASAs. The thickness of the bars indicates residue population contained within that cluster. The black bars indicate  $f_{prot}$ , the fraction of the residues in the cluster protonated.
