# Supplementary material for: 3D Interaction Homology: Computational Titration of Aspartic Acid, Glutamic Acid and Histidine Can Create pH-Tunable Hydropathic Environment Maps
Source: PubMed Central journal article supplement (PMC8595396; doi:10.3389/fmolb.2021.773385), 2021-11-03
Supplement: Table2.pdf [file Table2.pdf]

**Table S2: Number of residues in each chess square and parse for ASP, GLU and HIS.**

| <b>Number of aspartates in parses</b> |                                 |                                         |                                              | <b>60 / 180 / 300</b>                             |                         |                                |                           |                         |
|---------------------------------------|---------------------------------|-----------------------------------------|----------------------------------------------|---------------------------------------------------|-------------------------|--------------------------------|---------------------------|-------------------------|
|                                       | <b>a</b>                        | <b>b</b>                                | <b>c</b>                                     | <b>d</b>                                          | <b>e</b>                | <b>f</b>                       | <b>g</b>                  | <b>h</b>                |
| <b>1</b>                              | 261/342/22                      | 556/323/200                             | 1162/260/650                                 | 39/37/120                                         | 0/0/0                   | 3/2/15                         | 0/5/4                     | 0/0/1                   |
| <b>2</b>                              | 14/8/0                          | 47/6/7                                  | 33/16/13                                     | 0/2/1                                             | 0/1/1                   | 4/29/56                        | 0/0/0                     | 0/0/0                   |
| <b>3</b>                              | 0/3/0                           | 4/25/8                                  | 10/20/34                                     | 11/15/19                                          | 2/1/2                   | 3/8/25                         | 0/2/3                     | 0/1/0                   |
| <b>4</b>                              | 5/9/2                           | 10/44/76                                | 279/833/4142                                 | 395/1578/6215                                     | 4/1/7                   | 0/2/14                         | 0/12/10                   | 0/2/8                   |
| <b>5</b>                              | 10/11/3                         | 647/60/263                              | 2539/309/3409                                | 169/92/477                                        | 0/0/0                   | 6/22/160                       | 8/21/111                  | 5/2/1                   |
| <b>6</b>                              | 8/18/5                          | 326/181/131                             | 313/142/274                                  | 2/5/7                                             | 2/1/3                   | 10/492/1035                    | 1/21/25                   | 1/0/0                   |
| <b>7</b>                              | 2/163/6                         | 23/1279/126                             | 43/2250/254                                  | 6/67/23                                           | 3/5/6                   | 7/65/74                        | 0/18/4                    | 0/2/1                   |
| <b>8</b>                              | 27/292/13                       | 118/1035/615                            | 168/2483/2284                                | 44/854/919                                        | 1/2/3                   | 0/4/3                          | 0/2/4                     | 0/2/1                   |
| <b>Number of glutamates in parses</b> |                                 |                                         |                                              | <b>60.60 / 60.180 / 60.300</b>                    |                         |                                |                           |                         |
|                                       |                                 |                                         |                                              | <b>180.60 / 180.180 / 180.300</b>                 |                         |                                |                           |                         |
|                                       |                                 |                                         |                                              | <b>300.60 / 300.180 / 300.300</b>                 |                         |                                |                           |                         |
|                                       | <b>a</b>                        | <b>b</b>                                | <b>c</b>                                     | <b>d</b>                                          | <b>e</b>                | <b>f</b>                       | <b>g</b>                  | <b>h</b>                |
| <b>1</b>                              | 4/218/15<br>16/24/2<br>2/22/4   | 20/420/33<br>30/65/6<br>28/490/233      | 7/95/35<br>35/40/2<br>66/538/279             | 1/18/12<br>13/16/3<br>22/50/24                    | 0/0/0<br>0/0/0<br>0/0/0 | 0/0/0<br>0/0/0<br>3/3/0        | 0/0/0<br>0/0/0<br>0/0/0   | 0/0/0<br>1/0/0<br>0/0/0 |
| <b>2</b>                              | 0/0/0<br>0/3/0<br>0/1/0         | 3/8/1<br>1/0/0<br>3/10/6                | 0/2/0<br>3/0/1<br>4/9/6                      | 0/0/1<br>0/1/0<br>1/1/1                           | 0/0/0<br>0/0/0<br>0/0/0 | 1/1/0<br>3/1/0<br>2/25/17      | 0/0/0<br>2/0/0<br>0/0/0   | 0/0/0<br>1/0/0<br>0/0/0 |
| <b>3</b>                              | 0/0/0<br>0/1/0<br>0/0/0         | 0/1/0<br>1/10/1<br>1/8/2                | 0/1/0<br>12/14/2<br>10/18/5                  | 2/2/2<br>18/19/2<br>9/23/14                       | 0/1/0<br>5/4/0<br>2/1/3 | 0/0/0<br>1/3/0<br>3/7/1        | 0/0/0<br>2/0/0<br>1/4/2   | 0/0/0<br>1/0/0<br>0/0/0 |
| <b>4</b>                              | 1/4/1<br>5/8/3<br>0/3/2         | 1/10/1<br>22/43/9<br>7/95/58            | 25/299/133<br>1135/1983/224<br>698/3463/1799 | 32/374/212<br>1393/4345/325<br>1139/4563/186<br>8 | 0/3/1<br>2/2/1<br>2/2/1 | 0/1/0<br>1/1/0<br>0/3/3        | 0/0/0<br>0/8/0<br>0/5/2   | 0/1/0<br>4/2/1<br>0/0/0 |
| <b>5</b>                              | 1/4/1<br>2/0/0<br>1/4/0         | 1/62/10<br>14/30/3<br>23/261/87         | 41/538/438<br>174/252/25<br>465/2053/1089    | 11/219/153<br>54/122/9<br>152/311/122             | 0/0/0<br>0/0/0<br>0/0/0 | 0/3/2<br>1/4/0<br>11/56/19     | 0/0/0<br>2/2/0<br>6/46/21 | 0/0/0<br>0/0/0<br>0/0/0 |
| <b>6</b>                              | 0/0/1<br>2/6/0<br>0/4/0         | 1/41/3<br>11/12/3<br>6/111/34           | 5/42/15<br>20/19/8<br>30/119/68              | 0/1/1<br>0/1/1<br>1/1/1                           | 0/2/0<br>1/0/0<br>0/2/1 | 2/5/3<br>27/23/0<br>17/378/145 | 0/0/0<br>3/1/0<br>2/7/2   | 0/0/0<br>0/0/0<br>0/0/0 |
| <b>7</b>                              | 0/2/0<br>6/15/3<br>0/3/1        | 2/17/1<br>64/201/17<br>18/223/78        | 2/15/7<br>69/208/28<br>38/262/109            | 0/0/2<br>11/16/3<br>2/16/8                        | 0/4/1<br>1/0/0<br>2/3/0 | 0/6/1<br>15/2/1<br>4/33/11     | 0/1/0<br>2/3/0<br>0/0/3   | 0/0/0<br>1/4/1<br>0/0/1 |
| <b>8</b>                              | 10/84/4<br>61/234/10<br>0/23/10 | 15/442/25<br>251/1511/55<br>56/1852/419 | 19/213/56<br>404/1854/84<br>181/1733/779     | 14/91/23<br>193/645/43<br>87/376/217              | 0/0/0<br>1/3/2<br>2/0/1 | 0/0/0<br>1/6/0<br>1/1/0        | 0/1/0<br>0/3/0<br>3/1/2   | 0/1/0<br>0/0/0<br>0/0/0 |
| <b>Number of histidines in parses</b> |                                 |                                         |                                              | <b>60 / 180 / 300</b>                             |                         |                                |                           |                         |
|                                       | <b>a</b>                        | <b>b</b>                                | <b>c</b>                                     | <b>d</b>                                          | <b>e</b>                | <b>f</b>                       | <b>g</b>                  | <b>h</b>                |
| <b>1</b>                              | 192/22/3                        | 316/27/416                              | 119/35/226                                   | 14/10/15                                          | 0/0/0                   | 1/2/1                          | 0/1/0                     | 0/0/1                   |
| <b>2</b>                              | 1/0/0                           | 4/2/8                                   | 0/0/5                                        | 0/0/0                                             | 0/0/0                   | 0/0/12                         | 0/0/0                     | 0/0/0                   |
| <b>3</b>                              | 0/0/0                           | 6/11/13                                 | 1/7/7                                        | 0/13/3                                            | 0/1/0                   | 0/2/4                          | 0/0/0                     | 0/0/0                   |
| <b>4</b>                              | 1/5/1                           | 4/30/80                                 | 94/739/947                                   | 125/1504/905                                      | 0/1/1                   | 0/3/4                          | 0/7/5                     | 0/0/0                   |
| <b>5</b>                              | 2/0/7                           | 45/10/431                               | 395/69/1249                                  | 98/32/86                                          | 0/0/0                   | 0/1/55                         | 0/1/42                    | 0/0/0                   |
| <b>6</b>                              | 1/2/2                           | 25/12/282                               | 9/17/206                                     | 0/1/0                                             | 0/0/0                   | 20/43/503                      | 0/0/24                    | 0/0/0                   |
| <b>7</b>                              | 1/14/0                          | 12/176/251                              | 3/231/259                                    | 4/3/3                                             | 2/1/1                   | 5/18/17                        | 0/1/5                     | 0/0/1                   |
| <b>8</b>                              | 54/229/7                        | 172/759/1009                            | 39/748/1025                                  | 34/375/171                                        | 0/1/2                   | 0/0/3                          | 0/1/9                     | 2/1/0                   |
