# Supplementary material for: 3D Interaction Homology: Computational Titration of Aspartic Acid, Glutamic Acid and Histidine Can Create pH-Tunable Hydropathic Environment Maps
Source: PubMed Central journal article supplement (PMC8595396; doi:10.3389/fmolb.2021.773385), 2021-11-03
Supplement: Table4.pdf [file Table4.pdf]

**Table S4: Number of clusters in each chess square and parse for ASP, GLU and HIS.**

| <b>Number of aspartate clusters in parses</b> |                           | <b>60 / 180 / 300</b>                                                                                    |                                 |                                 |                         |                           |                         |                         |
|-----------------------------------------------|---------------------------|----------------------------------------------------------------------------------------------------------|---------------------------------|---------------------------------|-------------------------|---------------------------|-------------------------|-------------------------|
|                                               | <b>a</b>                  | <b>b</b>                                                                                                 | <b>c</b>                        | <b>d</b>                        | <b>e</b>                | <b>f</b>                  | <b>g</b>                | <b>h</b>                |
| <b>1</b>                                      | 12/12/5                   | 12/12/12                                                                                                 | 12/12/12                        | 9/7/10                          | 0/0/0                   | 1/1/3                     | 0/2/1                   | 0/0/1                   |
| <b>2</b>                                      | 4/2/0                     | 8/2/2                                                                                                    | 6/4/3                           | 0/1/1                           | 0/1/1                   | 1/5/11                    | 0/0/0                   | 0/0/0                   |
| <b>3</b>                                      | 0/1/0                     | 1/5/3                                                                                                    | 3/5/6                           | 3/5/5                           | 1/1/1                   | 1/2/6                     | 0/1/1                   | 0/1/0                   |
| <b>4</b>                                      | 1/3/1                     | 3/8/11                                                                                                   | 12/12/12                        | 12/12/12                        | 1/1/2                   | 0/1/4                     | 0/3/3                   | 0/1/1                   |
| <b>5</b>                                      | 3/3/1                     | 12/7/12                                                                                                  | 12/12/12                        | 11/10/12                        | 0/0/0                   | 2/6/12                    | 3/5/12                  | 2/1/1                   |
| <b>6</b>                                      | 3/5/2                     | 12/12/8                                                                                                  | 12/11/12                        | 1/2/2                           | 1/1/1                   | 3/12/12                   | 1/5/5                   | 1/0/0                   |
| <b>7</b>                                      | 1/11/2                    | 5/12/12                                                                                                  | 7/12/12                         | 2/9/5                           | 1/1/1                   | 2/10/9                    | 0/4/1                   | 0/1/1                   |
| <b>8</b>                                      | 5/12/4                    | 11/12/12                                                                                                 | 12/12/12                        | 7/12/12                         | 1/1/1                   | 0/1/1                     | 0/1/1                   | 0/1/1                   |
| <b>Number of glutamate clusters in parses</b> |                           | <b>60.60 / 60.180 / 60.300</b><br><b>180.60 / 180.180 / 180.300</b><br><b>300.60 / 300.180 / 300.300</b> |                                 |                                 |                         |                           |                         |                         |
|                                               | <b>a</b>                  | <b>b</b>                                                                                                 | <b>c</b>                        | <b>d</b>                        | <b>e</b>                | <b>f</b>                  | <b>g</b>                | <b>h</b>                |
| <b>1</b>                                      | 1/12/4<br>4/4/1<br>1/5/1  | 4/12/8<br>6/7/2<br>4/12/12                                                                               | 3/12/6<br>5/6/1<br>11/12/12     | 1/4/3<br>4/5/1<br>4/9/5         | 0/0/0<br>0/0/0<br>0/0/0 | 0/0/0<br>0/0/0<br>1/1/0   | 0/0/0<br>0/0/0<br>0/0/0 | 0/0/0<br>1/0/0<br>0/0/0 |
| <b>2</b>                                      | 0/0/0<br>0/1/0<br>0/1/0   | 1/3/1<br>1/0/0<br>1/3/2                                                                                  | 0/1/0<br>1/0/1<br>1/3/2         | 0/0/1<br>0/1/0<br>1/1/1         | 0/0/0<br>0/0/0<br>0/0/0 | 1/1/0<br>1/1/0<br>1/6/5   | 0/0/0<br>1/0/0<br>0/0/0 | 0/0/0<br>1/0/0<br>0/0/0 |
| <b>3</b>                                      | 0/0/0<br>0/1/0<br>0/0/0   | 0/1/0<br>1/1/1<br>1/1/1                                                                                  | 0/1/0<br>4/4/1<br>3/5/1         | 1/1/1<br>5/6/1<br>3/5/4         | 0/1/0<br>1/1/0<br>1/1/1 | 0/0/0<br>1/1/0<br>1/1/1   | 0/0/0<br>1/0/0<br>1/1/1 | 0/0/0<br>1/0/0<br>0/0/0 |
| <b>4</b>                                      | 1/1/1<br>2/3/1<br>0/1/1   | 1/3/1<br>7/7/3<br>2/9/9                                                                                  | 5/12/12<br>12/12/12<br>12/12/12 | 6/12/12<br>12/12/12<br>12/12/12 | 0/1/1<br>1/1/1<br>1/1/1 | 0/1/0<br>1/1/0<br>0/1/1   | 0/0/0<br>0/3/0<br>0/1/1 | 0/1/0<br>1/1/1<br>0/0/0 |
| <b>5</b>                                      | 1/1/1<br>1/0/0<br>1/1/0   | 1/7/3<br>4/6/1<br>4/12/10                                                                                | 9/12/12<br>12/12/6<br>12/12/12  | 3/12/12<br>9/12/3<br>9/12/12    | 0/0/0<br>0/0/0<br>0/0/0 | 0/1/1<br>1/1/0<br>3/9/4   | 0/0/0<br>1/1/0<br>2/6/5 | 0/0/0<br>0/0/0<br>0/0/0 |
| <b>6</b>                                      | 0/0/1<br>1/2/0<br>0/1/0   | 1/6/1<br>3/3/1<br>2/10/5                                                                                 | 1/6/4<br>5/4/3<br>4/10/11       | 0/1/0<br>0/1/1<br>1/1/1         | 0/1/0<br>1/0/0<br>0/1/1 | 1/2/1<br>4/4/0<br>4/12/10 | 0/0/0<br>1/1/0<br>1/2/1 | 0/0/0<br>0/0/0<br>0/0/0 |
| <b>7</b>                                      | 0/1/0<br>1/4/1<br>0/1/1   | 1/4/1<br>9/9/4<br>4/12/6                                                                                 | 1/4/3<br>10/12/6<br>9/12/12     | 0/0/1<br>4/5/1<br>1/4/3         | 0/0/0<br>0/0/0<br>0/0/0 | 0/2/1<br>3/1/1<br>1/6/3   | 0/1/0<br>1/1/0<br>0/0/1 | 0/0/0<br>1/1/1<br>0/0/1 |
| <b>8</b>                                      | 3/9/1<br>10/12/3<br>0/4/3 | 4/12/5<br>12/12/5<br>8/12/12                                                                             | 5/12/8<br>12/12/12<br>11/12/12  | 4/12/6<br>12/12/6<br>9/12/12    | 0/0/0<br>1/1/1<br>1/0/1 | 0/0/0<br>1/1/0<br>1/1/0   | 0/1/0<br>0/1/0<br>1/1/1 | 0/1/0<br>0/0/0<br>0/0/0 |
| <b>Number of histidine clusters in parses</b> |                           | <b>60 / 180 / 300</b>                                                                                    |                                 |                                 |                         |                           |                         |                         |
|                                               | <b>a</b>                  | <b>b</b>                                                                                                 | <b>c</b>                        | <b>d</b>                        | <b>e</b>                | <b>f</b>                  | <b>g</b>                | <b>h</b>                |
| <b>1</b>                                      | 9/5/1                     | 12/6/12                                                                                                  | 9/7/10                          | 3/2/5                           | 0/0/0                   | 1/1/1                     | 0/1/0                   | 0/0/1                   |
| <b>2</b>                                      | 1/0/0                     | 1/1/3                                                                                                    | 0/0/2                           | 0/0/0                           | 0/0/0                   | 0/0/3                     | 0/0/0                   | 0/0/0                   |
| <b>3</b>                                      | 0/0/0                     | 1/3/3                                                                                                    | 1/2/2                           | 0/4/1                           | 0/1/0                   | 0/1/1                     | 0/0/0                   | 0/0/0                   |
| <b>4</b>                                      | 1/2/1                     | 1/7/9                                                                                                    | 10/12/12                        | 11/12/12                        | 0/1/1                   | 0/1/1                     | 0/2/2                   | 0/0/0                   |
| <b>5</b>                                      | 1/0/2                     | 7/3/12                                                                                                   | 12/8/12                         | 10/6/8                          | 0/0/0                   | 0/1/9                     | 0/1/7                   | 0/0/0                   |
| <b>6</b>                                      | 1/1/1                     | 5/3/12                                                                                                   | 3/4/9                           | 0/1/0                           | 0/0/0                   | 5/8/12                    | 0/0/7                   | 0/0/0                   |
| <b>7</b>                                      | 1/4/0                     | 4/12/12                                                                                                  | 1/12/11                         | 1/1/1                           | 1/1/1                   | 2/4/5                     | 0/1/2                   | 0/0/1                   |
| <b>8</b>                                      | 8/12/3                    | 12/12/12                                                                                                 | 6/12/12                         | 6/12/10                         | 0/1/1                   | 0/0/1                     | 0/1/3                   | 1/1/0                   |
